# Supplementary material
Source: ML conference proceedings conference paper supplement (https://openreview.net/forum?id=M7hijAPA4B)
Supplement: supplementary_material [file attachment]

---

# Feature Dropout: Revisiting the Role of Augmentations in Contrastive Learning

---

Anonymous Author(s)

Affiliation

Address

email

## Abstract

1       What role do augmentations play in contrastive learning? Recent work suggests  
2       that good augmentations are *label-preserving* with respect to a specific downstream  
3       task. We complicate this picture by showing that label-destroying augmentations  
4       can be useful in the foundation model setting, where the goal is to learn diverse,  
5       general-purpose representations for *multiple* downstream tasks. We perform con-  
6       trastive learning experiments on a range of image and audio datasets with multiple  
7       downstream tasks (e.g. synthetic datasets combining two classes, such as images  
8       and digits, and naturalistic datasets labeled with dozens of attributes). In controlled  
9       experiments where we destroy features at different rates, we find that destroying  
10      one feature a modest fraction of the time can improve learning of other features,  
11      while still enabling the dropped out feature to be learned well. Additionally, we  
12      show how this hypothesis can help explain the success of Viewmaker Networks,  
13      which generate augmentations that appear to target and destroy different features  
14      in the input examples, yet often result in better performance than standard augmen-  
15      tations across tasks. To support our empirical results, we theoretically analyze a  
16      simple contrastive learning setting with a linear model. In this setting, we show that  
17      label-destroying augmentations are crucial for preventing one set of features from  
18      suppressing the learning of features useful for another downstream task. Our results  
19      highlight the need for analyzing the interaction between *multiple* downstream tasks  
20      when trying to explain the success of foundation models.

## 1 Introduction

22    In recent years, foundation models [5] have exhibited remarkable progress on a range of AI tasks  
23    [13; 31; 37; 36; 6; 11; 25; 1; 38]. A crucial characteristic of foundation models is that they can be  
24    adapted for a range of downstream tasks. For example, a foundation model trained on ImageNet  
25    should ideally not only perform well at object classification, but should also have learned general  
26    features useful for localization, segmentation, and other visual tasks. Indeed, this is borne out by  
27    recent work showing the high accuracy of foundation models on a range of downstream tasks [9], as  
28    well as a range of analysis work showing that models learn high-level semantic features including  
29    texture, color, pose, and style [19].

30    One popular strategy for training foundation models involves training models to match transformed  
31    versions (known as *views* or *augmentations*) of the same input. For example, image views might  
32    include common data augmentations such as cropping or color jitter [9], while views for speech  
33    might include pitch modulation or spectrogram masking [27; 35]. This family of objectives includes  
34    contrastive approaches such as SimCLR and MoCo, as well as non-contrastive approaches such as  
35    BYOL and SwAV [9; 23; 20; 7].

Given the central importance of these views for defining the self-supervised task, much work has focused on the question of what views lead to high-quality representations. The prevailing consensus, exemplified by Tian et al. [52], holds that views should be *label-preserving* with respect to a downstream task. In other words, because the contrastive loss will produce representations which are *invariant* to features that vary across views, any information we wish to preserve in the representations should not be altered by such views. As Tian et al. [52] write: “A good set of views are those that share the minimal information necessary to perform well at the downstream task.”

Here, we question whether this assumption—in particular, with its focus on a single task—is enough to explain why contrastive foundation models succeed on a *range* of downstream tasks. In Section 2, we observe that the actual choice and application of **views in practice** does not align with this prevailing consensus. For example, complete invariance to several common augmentations (e.g. shifts in brightness or cropping) is undesirable since augmentations of inputs from different classes can collide. Furthermore, in many cases there are explicit ways to specify invariances (e.g. converting images to grayscale) that researchers avoid, instead specifying them indirectly via augmentations (e.g. hue shifts). These observations suggest that specifying invariances is not the sole role of these views.

Instead, we suspect that augmentations serve as a form of **feature dropout**—preventing any one feature from becoming a shortcut feature and suppressing the learning of other features. We study this idea empirically with a set of synthetic datasets constructed by overlaying a simple element (e.g. a digit, shape, letter, or speech snippet) on an image or audio recording. We find that adding such a simple feature can dramatically decrease how well the other feature is learned, but that stochastically “dropping out” the simple feature can enable both features to be learned well. Next, we use this perspective to explain the success of Viewmaker Networks, a recently proposed method that generates augmentations for contrastive learning via adversarial training. We apply viewmaker and expert views to these same synthetic datasets, as well as a naturalistic dataset of facial images annotated with 40 different attributes (e.g. “wearing lipstick” or “blond hair”). Across these settings, we find that viewmaker augmentations learn to selectively obscure various features in the input. Despite this, the viewmaker representations still learn the downstream tasks well, while expert views often struggle on one or more of the attributes. This further suggests that being label-preserving is not a necessary property of good views, as long as the label information is still *sometimes* accessible.

Finally, we formalize the intuition that feature dropout can aid learning with a theoretical analysis of a simple linear contrastive setting. In this setting, we characterize how the noisiness of each feature directly determines how quickly features are learned, and uncover an **interaction between features** governing how fast they are learned. In particular, we show how learning one feature quickly can suppress the learning of other features, and show that adding noise to the “easiest” feature can *increase* the rate at which other features are learned. This further indicates that *label-destroying* augmentations may have a direct role in ensuring that contrastive models learn a broad range of features for downstream tasks.

Overall, these findings suggest the need to revisit common assumptions about the role of augmentations for contrastive learning in the foundation model setting, and move towards a better understanding of how to train generalist models that learn diverse features from unlabeled data.

## 2 Common practices are at odds with the “invariance” explanation

We begin by briefly exploring several common augmentations used in contrastive learning for natural images, and explore how they come into conflict with the common assumption described above. First, we observe that many common augmentations can affect the label of the input, depending on the downstream task. For example, many downstream image recognition tasks require color information (e.g. identifying bird species) or brightness (e.g. scene or time-of-day classification), implying that invariance to these characteristics would be undesirable. Yet hue shifts, greyscaling, and brightness shifts are common augmentations used in contrastive learning Chen et al. [9]; He et al. [23].

Second, repeated application of some augmentations causes challenges for *all* downstream tasks. For example, applying brightness shifts repeatedly results in any image turning completely black or completely white. Thus the class label cannot be truly invariant to this augmentation, since inputs from different classes can experience an “augmentation collision” at this black or white image (this is

88 formalized in Appendix C).<sup>1</sup> This argument also applies to other augmentations, including shifts in  
89 contrast<sup>2</sup> and random masking.

90 Third, some augmentations are commonly used *despite* ways of explicitly encoding invariance to  
91 them. For example, two image augmentations are *hue shifts* and *greyscaling*. Invariance to both of  
92 these augmentations can be explicitly encoded by always converting an image to greyscale. Yet doing  
93 so is not common practice because color information is still desirable for many downstream tasks.

94 The contradictions between the invariance rationale for augmentations in contrastive learning and  
95 these common practices suggest the need for additional explanations for the role of augmentations.

### 96 3 Controlled experiments demonstrate the benefits of feature dropout in 97 settings with multiple features

98 In this section, we present controlled experiments on synthetic data demonstrating how label-  
99 destroying augmentations can balance the learning of multiple features during contrastive learning.  
100 Our core toolkit is to overlay images with a set of synthetic features. As we will show, the presence  
101 of these synthetic features causes the network to learn the synthetic features very well at the expense  
102 of the image features, as measured by downstream classification accuracy. However, “dropping out”  
103 these features some fraction of the time during contrastive learning enables us to trade-off how well  
104 each feature is learned, while not resulting in complete invariance to either set of features.

#### 105 3.1 Datasets

106 We consider the behavior of viewmaker networks on four synthetic datasets, including three image  
107 and one audio dataset. Each dataset is constructed in such a way as to support two distinct downstream  
108 classification tasks, enabling us to examine precisely how well each downstream task is learned. The  
109 presence of two downstream tasks enables us to analyze the foundation model setting where we wish  
110 to learn features relevant for multiple downstream tasks, as opposed to one set or the other.

111 **Image datasets** The three image datasets are based on the canonical CIFAR-10 image-recognition  
112 dataset [28] (MIT-License). One task is always to predict the CIFAR-10 object label (e.g. airplane  
113 or bird). The other task is dependent on an additional feature overlaid on the image: **C+Shapes:**  
114 The CIFAR-10 image is overlaid with one of three randomly-colored shapes: a square, a triangle,  
115 or a circle. The second task is to predict what shape was overlaid (N=3 classes). **C+Digits:** The  
116 CIFAR-10 images are overlaid with four copies of a randomly-sampled digit from the MNIST dataset.  
117 The second task is to predict the digit class (N=10 classes). **C+Letters:** The CIFAR-10 images are  
118 overlaid with four copies of a randomly-colored English letter. The second task is to predict the class  
119 of the letter (N=26 classes).

120 **Audio dataset** The audio dataset is created by overlaying the audio of a spoken digit (from the  
121 AudioMNIST dataset [3], MIT License) with a random background sound (collected from one of  
122 three possible classes: cafe, machinery, and traffic) [43; 42]. The tasks are to predict the digit class  
123 (N=10 classes) and to predict the sound class (N=3 classes). Inputs are presented to the network as  
124 log mel spectrograms.

#### 125 3.2 Experiments

126 **Pretraining** We pretrain with the SimCLR algorithm for 200 epochs with a batch size of 256 and  
127 a temperature of 0.1. We use a ResNet-18 model with standard modifications for smaller inputs  
128 (including a smaller stride and no initial maxpool) as used in Tamkin et al. [49]. We use the standard  
129 SimCLR augmentations for the image datasets [9], and the SpecAug [35] augmentations for the audio  
130 datasets, which randomly mask out different frequency and time bands, as well as the WaveAug [27]  
131 augmentations, which alter various properties of the waveform such as the pitch and speed.

---

<sup>1</sup>Note that invariance is not to be confused with the related but distinct property of equivariance, often  
discussed as a desirable property of network architectures (e.g. see Fukushima and Miyake [17]; Chen et al. [8]).

<sup>2</sup>Continuous reduction in contrast eventually produces single-color images, given finite precision images.

**Linear Evaluation** We evaluate the quality of the learned representations by training a linear softmax classifier on top of the prepool representations. We train for 100 epochs, using the same parameters as Tamkin et al. [49], training separate linear classifiers using the same pretrained network for each downstream task [9]. Augmentations are applied during training but not evaluation.

**Results** As shown in Figure 4 in the appendix, we see an interaction between the two features, where dropping out the synthetic feature improves learning of the main image or audio class. Across settings, we see regions where both features are still learned well, providing a concrete example of how feature dropout can be useful when learning multiple features during contrastive learning.

## 4 Viewmaker Networks Succeed Despite Destroying Label Information

As another point of evidence that good views need not be label-preserving, we consider viewmaker networks [49], a generative model which produces augmentations for contrastive learning. Intuitively, viewmakers learn a stochastic augmentation policy that makes the contrastive task as hard as possible for the encoder. The stochastic augmentations are parameterized as additive perturbations bounded by an  $L_1$  norm, meaning the viewmaker can alter but not completely destroy the original image.

Formally, given an input  $x \in \mathbb{N}$ , a viewmaker network  $V_\psi$  is trained jointly with an encoder  $E_\theta$  to optimize the minimax expression:

$$\max_{\psi} \min_{\theta} \mathcal{L} \left( E_{\theta} \left( x + \epsilon \frac{V_{\psi}(x, \delta_1)}{\|V_{\psi}(x, \delta_1)\|_1} \right), E_{\theta} \left( x + \epsilon \frac{V_{\psi}(x, \delta_2)}{\|V_{\psi}(x, \delta_2)\|_1} \right) \right)$$

Here  $\mathcal{L}$  is a multiview loss function (e.g. [9; 23]),  $x$  is a minibatch of inputs,  $\|\cdot\|_1$  is the  $L_1$  norm,  $\epsilon$  is the *distortion budget* controlling the strength of the views, and  $\delta_1, \delta_2 \sim N(0, I)$  are random inputs that enable the viewmaker to learn a stochastic augmentation policy. We clamp the output of the viewmaker for images to  $[0, 1]$  as in Tamkin et al. [49].

Viewmaker networks learn to stochastically alter different parts of the input, including task-relevant features, meaning that these augmentations are not label-preserving. Nevertheless, as we will see shortly, viewmaker networks enable strong performance on multiple downstream tasks, including often better performance than expert-designed augmentations. Moreover, this **feature dropout** capability of viewmaker networks may help them learn many features well rather than just the easiest.

### 4.1 Experiments and Results

**Experimental Settings** We use the same experimental settings as Section 3, however without manual dropout of the synthetic features. In one set of experiments, we use the standard augmentations from Chen et al. [9], which we henceforth refer to as the *expert augmentations*. For the experiments with *viewmaker augmentations*, we use a budget of  $\epsilon = 0.05P$  for the image datasets, and  $\epsilon = 0.125P$  for the audio datasets, where  $P$  is the number of pixels in the input.

**Additional naturalistic dataset with 40 attributes** To further validate the behavior of viewmaker on realistic multi-feature datasets, we consider the CelebA [32] dataset, a large database of faces annotated with 40 different features. These features cover a wide spectrum of facial attributes, such as "Has Bangs" "Wearing Lipstick" and "Smiling," and enable us to further analyze whether viewmaker networks learn a broader range of features than commonly-used augmentations.

### 4.2 Results on two-feature datasets

**Qualitative evidence of feature dropout** Visually, the viewmaker augmentations seem to stochastically alter different aspects of the input, as shown in Figure 1. In addition to modifying the background of each input, the viewmaker also selectively modifies the additional synthetic features added to each domain: **C+Digits:** The viewmaker augmentations selectively add pixels to the MNIST digits, making it difficult to distinguish which number is present. **C+Shapes:** The viewmaker augmentations sometimes draw squares around the shape in the center, making it difficult to determine the shape class. **C+Letters:** The viewmaker draws letter-like markings on top of the letters, obscuring the letter identity and color. **Audio:** The viewmaker identifies the narrow band corresponding to the speech and applies perturbations to it. As can be seen in Figure 1, these label-destroying augmentations are quite common, occurring in a sizable fraction of the sampled views.

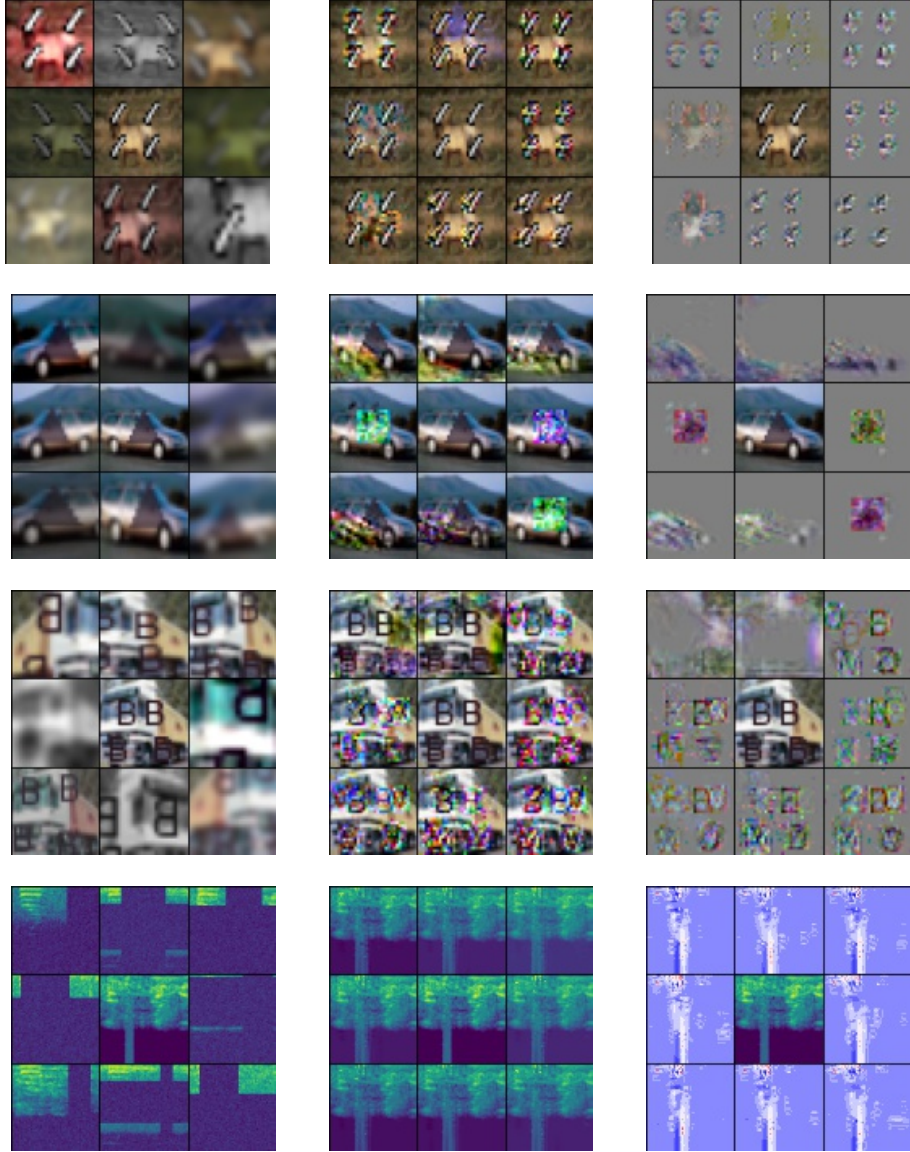

Figure 1: **Comparison of viewmaker and expert augmentations on datasets with multiple features.** The viewmaker augmentations adapt to the particular semantics of the input data, and make targeted perturbations which remove the class-relevant information of the synthetic features (e.g. occluding the digit, shape, letter, or speech). Despite this, the encoder network is still able to learn strong representations. *Rows* (from top): Digits, Shapes, Letters, Audio. *Columns* (from left): Expert augmentations, viewmaker augmentations, difference between original and viewmaker augmentation, rescaled to  $[0,1]$ . Center image in each grid is the original. Audio Expert views shown are Spectral views.

|               | VM (CIFAR-10) | Expert (CIFAR-10) | VM (Object)  | Expert (Object) |
|---------------|---------------|-------------------|--------------|-----------------|
| CIFAR-10 Only | 84.5          | <b>86.2</b>       | -            | -               |
| C+Shape       | <b>79.8</b>   | 76.0              | <b>100.0</b> | <b>100.0</b>    |
| C+Digit       | <b>69.3</b>   | 58.8              | <b>94.3</b>  | 86.7            |
| C+Letter      | 71.9          | <b>74.8</b>       | <b>96.9</b>  | 94.1            |

Table 1: **Transfer accuracy on different features.** Viewmaker (VM) networks are able to achieve good performance across multiple downstream tasks, while expert views sometimes falter. Networks are pretrained on the datasets on the left, and transfer accuracy is reported for the different conditions on the columns. Runs are averages of three seeds (with the exception of CIFAR-10 Only, from [49]).

|                  | Speech Accuracy |             |          | Background Sound Accuracy |          |              |
|------------------|-----------------|-------------|----------|---------------------------|----------|--------------|
|                  | Viewmaker       | Spectral    | Waveform | Viewmaker                 | Spectral | Waveform     |
| Speech Only      | 92.4            | <b>97.0</b> | 76.7     | -                         | -        | -            |
| Bkgd. Sound Only | -               | -           | -        | <b>100.0</b>              | 32.64    | <b>100.0</b> |
| Speech + Sound   | <b>60.8</b>     | 10.1        | 53.6     | <b>97.0</b>               | 47.2     | 43.3         |

Table 2: **Audio transfer accuracies.** Viewmaker networks achieve good performance across multiple tasks, while expert views sometimes suffer catastrophic drops as another feature is added. Networks are pretrained on the datasets on the left, and transfer accuracy is reported for the different conditions on the columns. Runs are averages of three seeds.

179 **Quantitative evidence of feature dropout** We also measure this selectivity of features quantitatively in Appendix D.2 and Figure 6. We augment images 1,200 times and observe the resulting probability assigned to the correct object class. Two clear modes appear for viewmaker, but not expert, augmentations. This corresponds to the fraction of time the viewmaker destroys the overlaid feature information (low  $P(\text{correct object class})$ ) and preserves it (high  $P(\text{correct object class})$ ).

184 **Viewmaker succeeds despite destroying label information** As shown in Table 1 and Table 2, viewmaker networks achieve good accuracy on both tasks, while expert augmentations frequently achieve lower performance on one or both. On image tasks, for example, while expert views achieve slightly higher performance when classifying the image only, they see a large drop in accuracy when the synthetic feature is added. In two of these cases (Shape and Digit) the viewmaker models are able to achieve a higher accuracy on both the image and the synthetic feature, while on the third (Letters) they achieve slightly lower accuracy on the images but achieve half the error on the synthetic object. For the audio experiments the picture is similar—viewmaker avoids catastrophic drops in performance learning both features together, achieving the highest accuracy on both, while the expert views see larger drops and worse overall performance. Note that the high performance of expert views for our control tasks (CIFAR-10/Speech/Sound Only) indicates that the viewmaker views are not merely better all-around views, but that they specifically help the model learn multiple features.

196 These results provide additional evidence that label-preserving views are not necessary for learning good representations—and that feature dropout may improve learning of multiple tasks.

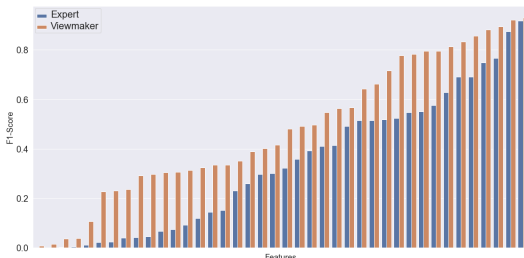

Figure 2: **Viewmaker networks capture a broader range of features on a naturalistic dataset.** Linear evaluation F1 score on CelebA for viewmaker and expert views. Attributes are sorted from lowest to highest accuracy within each augmentation type.

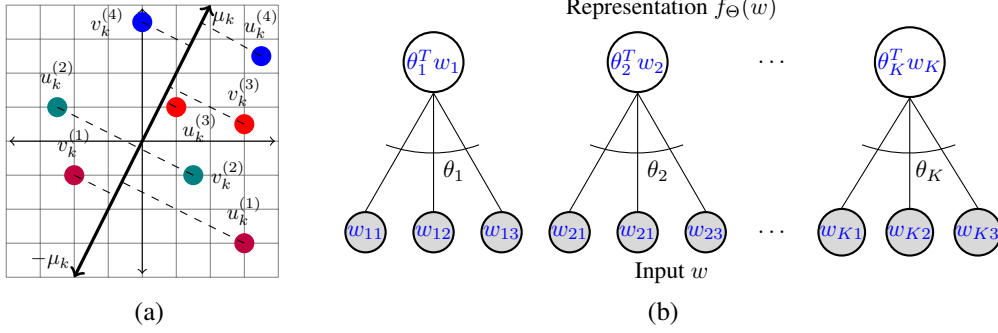

Figure 3: We show how label-destroying augmentations can aid learning of other features in a linear contrastive setting: (a) The correlation of the  $k$ th feature of an augmentation pair, shown for  $d = 2$ . Each pair  $u_k^{(i)}$  and  $v_k^{(i)}$  have correlated projections onto the ground truth  $\mu_k$  direction, representing the feature conserved across augmentations. (b) Feedforward linear network which computes the representation  $f_\Theta(w)$ . As each feature  $\mu_k$  is learned ( $\theta_k \rightarrow \mu_k$ ) the representations of the two views  $f_\Theta(u^{(i)})$ ,  $f_\Theta(v^{(i)})$  become more similar, decreasing the contrastive loss.

### 4.3 Results on naturalistic dataset

We observe similar qualitative and quantitative results for the CelebA dataset. We train models using the same settings in Section 3.2, using a budget of 0.01, and indeed find that viewmakers capture a much broader range of features, achieving an average F1 Score of **0.509** over the 40 features, compared to **0.334** for the SimCLR augmentations. In addition, the viewmaker augmentations clearly capture a wider range of features, as can be seen in Figure 2, especially at the tail of the distribution. Furthermore, we see bimodal disruption patterns in over two-thirds of the CelebA features, as shown in Figure 9, indicating significant feature dropout across in most attributes. We also show qualitative results in Figure 8 demonstrating that the viewmaker alters attributes such as facial features, hair color, and background elements in the scene. These results further support the hypothesis that viewmaker networks exhibit feature dropout, yet capture a broader range of features than expert views.

## 5 Theoretical Analysis of Feature Interactions in Linear Contrastive Setting

In this section, we analyze a simple linear model that captures the essence of how label-destroying augmentations can improve downstream accuracy. We study a setting where the data contains many underlying features that are relevant to downstream classification tasks, and where these features are preserved to varying degrees across augmentations. We will show that a linear model trained with a contrastive objective learns these features, and that adding noise to one feature can speed learning of others during gradient descent. One difference between the linear setting we analyze and Section 4 is that here add stochastic Gaussian noise to destroy features across augmentations, as opposed to the bimodal feature dropout behavior of viewmaker networks seen in Figure 1.

### 5.1 Data Model and Setting

We study a model which consists of data with  $K$  distinct features, each corresponding to some ground truth unit-vector directions  $\mu_1, \dots, \mu_K \in \mathbb{R}^d$ . We sample each data point  $u \in \mathbb{R}^{K \times d}$  and its augmentation (a.k.a. its *positive pair* or its *view*)  $v \in \mathbb{R}^{K \times d}$  as follows. For  $k \in 1, \dots, K$ , the  $k$ th row of  $u$ , which we denote  $u_k$ , is drawn from the Gaussian distribution  $\mathcal{N}(0, I_d)$ . The  $k$ th row of the augmentation,  $v_k$ , is drawn from the same distribution, but is correlated with  $u_k$  in the  $\mu_k$ -direction (and is otherwise independent in the other directions). The strength of the correlation is governed by parameter  $\alpha_k \in [0, 1]$  in the following sense:  $v_k^T \mu_k = \alpha_k u_k^T \mu_k + \sqrt{1 - \alpha_k^2} \xi$ , where  $\xi \sim \mathcal{N}(0, 1)$ . Thus the larger  $\alpha_k$ , the stronger the correlation in that feature across the two views. Figure 3(a) visualizes the correlation of  $(u_k, v_k)$  in an augmented pair. Formally, we can write that

$$(u_k, v_k) \sim \mathcal{N}\left(0, \begin{pmatrix} I_d & \alpha_k \mu_k \mu_k^T \\ \alpha_k \mu_k \mu_k^T & I_d \end{pmatrix}\right), \text{ for a vector } \alpha \in [0, 1]^K.$$

We will learn a model  $\Theta \in \mathbb{R}^{K \times d}$ , which represents a collection of  $K$  feature extractors, as pictured in Figure 3(b). The model  $\Theta$ , with rows  $\{\theta_k\}_{k \in [K]}$ , maps a data point  $w \in \mathbb{R}^{K \times d}$  to a representation  $f_\Theta(w) \in \mathbb{R}^K$  by computing a score  $w_k^T \theta_k$  for each element in the representation. That is,  $(f_\Theta(w))_k = w_k^T \theta_k$ . Our goal is that the model  $\Theta$  will be useful for a downstream classification task which depends on the ground truth features. A good representation will capture ground truth features that are correlated across augmentations, such that  $\theta_k$  is aligned with  $\mu_k$  or  $-\mu_k$ .

**Training.** We will study the evolution of  $\Theta$  as we optimize a standard contrastive learning objective using gradient descent [14; 9]. At each round of gradient descent, we sample a fresh batch of  $m$  data points and their augmentations,  $(U, V) := \{(u^{(i)}, v^{(i)})\}_{i \in [m]}$ . For each  $i, j \in [m]$ , we compute a similarity score  $z_{ij} := \langle f_\Theta(u^{(i)}), f_\Theta(v^{(j)}) \rangle = \sum_k (\theta_k^T u_k^{(i)}) (\theta_k^T v_k^{(j)})$  using the dot product of their  $K$ -dimensional representations. We then compute the logits  $p_{ij} := \frac{\exp(z_{ij})}{\sum_{j'} \exp(z_{ij'})}$  using the softmax function, and use the classwise cross entropy loss function  $\mathcal{L}(\Theta; U, V) := -\log(p_{ii})$ .

## 5.2 Main Result

We will study gradient descent (GD) on the cross entropy loss, and consider how adding noise to one feature affects the learning of the other features. As suggested earlier, we can measure how well we learn the  $k$ th feature by measuring the alignment of  $\theta_k$  with  $\mu_k$  or  $-\mu_k$ . A natural way to measure this alignment is the acute angle between  $\pm \mu_k$  and  $\theta_k$ , given by  $\arccos\left(\frac{|\mu_k^T \theta_k|}{\|\theta_k\|_2}\right)$ . Lemma F.1 in Appendix F proves that this quantity directly determines the test accuracy on a natural downstream linear classification task.

Formally, we say we *add noise* to some feature  $k'$  of a data point  $v$ , if for some  $\beta \in [0, 1)$ , we define the new noisy data point  $\tilde{v}$  to have coordinates  $\tilde{v}_{k'} = \beta v_{k'} + \sqrt{1 - \beta^2} \xi$ , where  $\xi \sim \mathcal{N}(0, I_d)$ , and  $\tilde{v}_k = v_k$  for  $k \neq k'$ . Thus if  $(u, v)$  were a pair generated with the correlation coefficients  $\{\alpha_k\}_{k \in [K]}$ , then the distribution of  $(u, \tilde{v})$  comes from the modified correlation coefficients  $\{\tilde{\alpha}_k\}_{k \in [K]}$  with the single modification  $\tilde{\alpha}_{k'} = \beta \alpha_{k'}$ . We now present our main theorem:

**Theorem 5.1** (Noise improves feature learning). *There exists a universal constant  $C$ , such that the following holds. Let  $\Theta^{(t+1)} = \Theta^{(t)} - \eta(\nabla \mathcal{L}(U, V; \Theta) + \lambda \Theta^{(t)})$ , and  $\tilde{\Theta}^{(t+1)} = \Theta^{(t)} - \eta(\nabla \mathcal{L}(U, \tilde{V}; \Theta) + \lambda \Theta^{(t)})$ , where  $\tilde{V}$  is  $V$  with any amount of added noise in the  $k'$  feature. This has the effect of changing  $\alpha_{k'}$  to  $\tilde{\alpha}_{k'}$  for any  $\tilde{\alpha}_{k'} < \alpha_{k'}$ . Then for any  $k \neq k'$ , if  $|\theta_k^T \mu_k| \leq \frac{1 - \alpha_{k'}^2}{C} \|\theta_k\|$ ,  $\|\theta_{k'}\|^3 \leq |\theta_{k'}^T \mu_k|$ , and  $\|\theta_k\|^2 \leq \frac{\alpha_k(1 - \alpha_{k'}^2)}{C}$ , then for a small enough step size  $\eta$ ,  $\mathbb{E}_{U, V} \left[ \arccos\left(\frac{|\mu_k^T \theta_k^{(t+1)}|}{\|\theta_k^{(t+1)}\|_2}\right) \right] > \mathbb{E}_{U, \tilde{V}} \left[ \arccos\left(\frac{|\mu_k^T \tilde{\theta}_k^{(t+1)}|}{\|\tilde{\theta}_k^{(t+1)}\|_2}\right) \right]$ .*

We briefly comment on the three assumptions on  $\Theta$  in the theorem. The first assumption,  $|\theta_k^T \mu_k| \leq \frac{1 - \alpha_{k'}^2}{C} \|\theta_k\|$  requires that  $\theta_k$  is not too aligned with  $\mu_k$  – that is, the result applies to all features  $k$  that aren't already learned too well. The second two assumptions are satisfied if the  $k'$ th feature has been learned to some extent, and the norm of  $\theta_k$  and  $\theta_{k'}$  are small, which can be enforced throughout training with  $\ell_2$  regularization.

The theorem guarantees that at any point in training, if we add noise to the  $k'$ th feature, the next step of GD learns all other features *better* than if we didn't add noise. To validate the implication of this result for the complete trajectory of GD, we include simulations in Appendix E. Our experiments show that introducing noise part-way through training to dominant features can significantly speed the alignment of weak features, with only a small cost to the alignment of the dominant features. We prove our result in Appendix F, including intuition and an overview of the ideas in Section F.3.

## 6 Related work

**Understanding contrastive and multiview learning** Many prior works have laid the foundations for current contrastive and multiview learning algorithms [4; 21; 14; 55; 2; 34; 23; 9]. Several works analyze contrastive learning to identify important factors [12; 58] or how contrastive models differ from supervised learning [57; 15; 26]. HaoChen et al. [22] study contrastive learning using



the concept of an augmentation graph. This model assumes the fraction of non-label preserving augmentations is “extremely small”; interestingly, we show in practice this can be quite large and still yield good performance. Wang et al. [54] theoretically study contrastive learning under an assumption of label-preserving augmentations, though they show that such an assumption alone does not suffice to learn. Most relevant to our work, Tian et al. [52]; Ericsson et al. [16] study how the information shared between different views impacts learning of downstream tasks. We complicate this picture by analyzing the foundation model setting where a single model must learn features for multiple tasks that are not known in advance. In this setting, we find that label-destroying perturbations, thought to be harmful by Tian et al. [52], are useful for preventing one feature from suppressing others.

**Feature suppression** Our work is closely connected to the notion of *feature suppression* [24], where the presence of one feature can suppress the learning of others. Several works explore this concept in contrastive learning. For example, the original SimCLR paper [9] noted that color jitter augmentation was necessary to prevent the network from using only the color profile of the input to solve the contrastive task. Followup work [10] characterizes how hyperparameters and dataset features affect feature suppression. Other works have attempted to address feature suppression in contrastive learning, either via auxiliary losses [29] or by modifying representations in the latent space [39]. Our empirically and theoretically investigates feature suppression as an alternate rationale for the role of augmentations, as opposed to invariance. We also show that an existing method, viewmaker networks [49], can identify and potentially neutralize suppressing features in an interpretable way, resulting in better performance than expert augmentations. These insights may also generalize to other self-supervised settings, such as language modeling, where multiple features may compete [47].

**Spurious correlations and shortcut features** Outside the framing of feature suppression, several other works explore how classifiers can learn or make use of unwanted features. Shortcut features [18] describe often-simple features (e.g. the average color of an input) which are learned by networks at the expense of more salient features (e.g. the object class). This notion is connected to spurious correlations [45] in deep learning which have been explored extensively [40; 41; 46; 53; 56], including in the context of self-supervised learning [33; 51]. Other works have also performed theoretical analysis of how related dynamics affect learning in the supervised setting [30; 44]. Our work suggests that viewmaker networks may be a useful tool as well here—both as an interpretability tool to visualize the different features a network relies on, and as a way to reduce reliance on particular features without completely destroying the information.

## 7 Discussion and Conclusion

We explore the idea that augmentations in contrastive learning function as a sort of “feature dropout.” First, we show that in datasets with multiple features, dropping out one set of features improves learning of the other features. Second, feature dropout may help explain how viewmaker networks can learn a wide range of features well, despite producing augmentations which appear to destroy different features in the input. Finally, we theoretically analyze a linear contrastive setting where we prove that label-destroying views have a positive effect on contrastive learning if the goal is to avoid learning one feature at the expense of others.

Our work has limitations: for example, while our experiments consider image and audio data, self-supervised learning may be applied to a much wider range of modalities [48; 50]. In addition, our theoretical analysis considers a linear contrastive setting, whereas current neural networks are highly nonlinear. Improving upon both of these fronts is an exciting area for future work. On the other hand, understanding augmentations as dropping out easy features suggests possible ways of improving the performance of self-supervised learning. For example, a guided version of viewmaker might enable prioritizing a subset of important features for learning, or might enable dropping out unwanted features such as watermarks, sensitive information, other image artifacts.

The challenge of learning a broad range of useful features lies at the heart of self-supervised learning. We hope our work sheds light on this challenge in contrastive learning, especially as these objectives continue to develop and are applied more broadly and at larger scale.

## References

- [1] Jean-Baptiste Alayrac, Jeff Donahue, Pauline Luc, Antoine Miech, Iain Barr, Yana Hasson, Karel Lenc, Arthur Mensch, Katie Millican, Malcolm Reynolds, Roman Ring, Eliza Rutherford, Serkan Cabi, Tengda Han, Zhitao Gong, Sina Samangooei, Marianne Monteiro, Jacob Menick, Sebastian Borgeaud, Andy Brock, Aida Nematzadeh, Sahand Sharifzadeh, Mikolaj Binkowski, Ricardo Barreira, Oriol Vinyals, Andrew Zisserman, and Karen Simonyan. Flamingo: a visual language model for few-shot learning. *ArXiv*, abs/2204.14198, 2022.
- [2] Philip Bachman, R. Devon Hjelm, and William Buchwalter. Learning representations by maximizing mutual information across views. In *NeurIPS*, 2019.
- [3] Soren Becker, Marcel Ackermann, Sebastian Lapuschkin, Klaus-Robert Müller, and Wojciech Samek. Interpreting and explaining deep neural networks for classification of audio signals. *ArXiv*, abs/1807.03418, 2018.
- [4] Suzanna Becker and Geoffrey E. Hinton. Self-organizing neural network that discovers surfaces in random-dot stereograms. *Nature*, 355:161–163, 1992.
- [5] Rishi Bommasani, Drew A. Hudson, Ehsan Adeli, Russ Altman, Simran Arora, Sydney von Arx, Michael S. Bernstein, Jeannette Bohg, Antoine Bosselut, Emma Brunskill, Erik Brynjolfsson, Shyamal Buch, Dallas Card, Rodrigo Castellon, Niladri S. Chatterji, Annie S. Chen, Kathleen Creel, Jared Davis, Dora Demszky, Chris Donahue, Moussa Doumbouya, Esin Durmus, Stefano Ermon, John Etchemendy, Kawin Ethayarajh, Li Fei-Fei, Chelsea Finn, Trevor Gale, Lauren E. Gillespie, Karan Goel, Noah D. Goodman, Shelby Grossman, Neel Guha, Tatsunori Hashimoto, Peter Henderson, John Hewitt, Daniel E. Ho, Jenny Hong, Kyle Hsu, Jing Huang, Thomas F. Icard, Saahil Jain, Dan Jurafsky, Pratyusha Kalluri, Siddharth Karamcheti, Geoff Keeling, Fereshte Khani, Omar Khattab, Pang Wei Koh, Mark S. Krass, Ranjay Krishna, Rohith Kudipudi, Ananya Kumar, Faisal Ladhak, Mina Lee, Tony Lee, Jure Leskovec, Isabelle Levent, Xiang Lisa Li, Xuechen Li, Tengyu Ma, Ali Malik, Christopher D. Manning, Suvir P. Mirchandani, Eric Mitchell, Zanele Munyikwa, Suraj Nair, Avanika Narayan, Deepak Narayanan, Benjamin Newman, Allen Nie, Juan Carlos Niebles, Hamed Nilforoshan, J. F. Nyarko, Giray Ogun, Laurel Orr, Isabel Papadimitriou, Joon Sung Park, Chris Piech, Eva Portelance, Christopher Potts, Aditi Raghunathan, Robert Reich, Hongyu Ren, Frieda Rong, Yusuf H. Roohani, Camilo Ruiz, Jack Ryan, Christopher R’e, Dorsa Sadigh, Shiori Sagawa, Keshav Santhanam, Andy Shih, Krishna Parasuram Srinivasan, Alex Tamkin, Rohan Taori, Armin W. Thomas, Florian Tramèr, Rose E. Wang, William Wang, Bohan Wu, Jiajun Wu, Yuhuai Wu, Sang Michael Xie, Michihiro Yasunaga, Jiaxuan You, Matei A. Zaharia, Michael Zhang, Tianyi Zhang, Xikun Zhang, Yuhui Zhang, Lucia Zheng, Kaitlyn Zhou, and Percy Liang. On the opportunities and risks of foundation models. *ArXiv*, abs/2108.07258, 2021.
- [6] Tom Brown, Benjamin Mann, Nick Ryder, Melanie Subbiah, Jared D Kaplan, Prafulla Dhariwal, Arvind Neelakantan, Pranav Shyam, Girish Sastry, Amanda Askell, et al. Language models are few-shot learners. *Advances in neural information processing systems*, 33:1877–1901, 2020.
- [7] Mathilde Caron, Ishan Misra, Julien Mairal, Priya Goyal, Piotr Bojanowski, and Armand Joulin. Unsupervised learning of visual features by contrasting cluster assignments. *Advances in Neural Information Processing Systems*, 33:9912–9924, 2020.
- [8] Shuxiao Chen, E. Dobriban, and Jane Lee. A group-theoretic framework for data augmentation. *arXiv: Machine Learning*, 2020.
- [9] Ting Chen, Simon Kornblith, Mohammad Norouzi, and Geoffrey E. Hinton. A simple framework for contrastive learning of visual representations. *ArXiv*, abs/2002.05709, 2020.
- [10] Ting Chen, Calvin Luo, and Lala Li. Intriguing properties of contrastive losses. *Advances in Neural Information Processing Systems*, 34, 2021.
- [11] Aakanksha Chowdhery, Sharan Narang, Jacob Devlin, Maarten Bosma, Gaurav Mishra, Adam Roberts, Paul Barham, Hyung Won Chung, Charles Sutton, Sebastian Gehrmann, Parker Schuh, Kensen Shi, Sasha Tsvyashchenko, Joshua Maynez, Abhishek Baidoor Rao, Parker Barnes, Yi Tay, Noam M. Shazeer, Vinodkumar Prabhakaran, Emily Reif, Nan Du, Benton C. Hutchison, Reiner Pope, James Bradbury, Jacob Austin, Michael Isard, Guy Gur-Ari, Pengcheng Yin,

- 377 Toju Duke, Anselm Levskaya, Sanjay Ghemawat, Sunipa Dev, Henryk Michalewski, Xavier  
378 García, Vedant Misra, Kevin Robinson, Liam Fedus, Denny Zhou, Daphne Ippolito, David  
379 Luan, Hyeontaek Lim, Barret Zoph, Alexander Spiridonov, Ryan Sepassi, David Dohan, Shivani  
380 Agrawal, Mark Omernick, Andrew M. Dai, Thanumalayan Sankaranarayana Pillai, Marie Pellat,  
381 Aitor Lewkowycz, Erica Oliveira Moreira, Rewon Child, Oleksandr Polozov, Katherine Lee,  
382 Zongwei Zhou, Xuezhi Wang, Brennan Saeta, Mark Diaz, Orhan Firat, Michele Catasta, Jason  
383 Wei, Kathleen S. Meier-Hellstern, Douglas Eck, Jeff Dean, Slav Petrov, and Noah Fiedel. Palm:  
384 Scaling language modeling with pathways. *ArXiv*, abs/2204.02311, 2022.
- 385 [12] Elijah Cole, Xuan S. Yang, Kimberly Wilber, Oisín Mac Aodha, and Serge J. Belongie. When  
386 does contrastive visual representation learning work? *ArXiv*, abs/2105.05837, 2021.
- 387 [13] Jacob Devlin, Ming-Wei Chang, Kenton Lee, and Kristina Toutanova. Bert: Pre-training of  
388 deep bidirectional transformers for language understanding. *ArXiv*, abs/1810.04805, 2019.
- 389 [14] Alexey Dosovitskiy, Jost Tobias Springenberg, Martin A. Riedmiller, and Thomas Brox. Dis-  
390 criminative unsupervised feature learning with convolutional neural networks. In *NIPS*, 2014.
- 391 [15] Linus Ericsson, Henry Gouk, and Timothy M. Hospedales. How well do self-supervised models  
392 transfer? *2021 IEEE/CVF Conference on Computer Vision and Pattern Recognition (CVPR)*,  
393 pages 5410–5419, 2021.
- 394 [16] Linus Ericsson, Henry Gouk, and Timothy M. Hospedales. Why do self-supervised models  
395 transfer? investigating the impact of invariance on downstream tasks. *ArXiv*, abs/2111.11398,  
396 2021.
- 397 [17] Kunihiko Fukushima and Sei Miyake. Neocognitron: A self-organizing neural network model  
398 for a mechanism of visual pattern recognition. In *Competition and cooperation in neural nets*,  
399 pages 267–285. Springer, 1982.
- 400 [18] Robert Geirhos, Jörn-Henrik Jacobsen, Claudio Michaelis, Richard S. Zemel, Wieland Brendel,  
401 Matthias Bethge, and Felix Wichmann. Shortcut learning in deep neural networks. *ArXiv*,  
402 abs/2004.07780, 2020.
- 403 [19] Gabriel Goh, Nick Cammarata, Chelsea Voss, Shan Carter, Michael Petrov, Ludwig Schubert,  
404 Alec Radford, and Christopher Olah. Multimodal neurons in artificial neural networks. 2021.
- 405 [20] Jean-Bastien Grill, Florian Strub, Florent Altché, Corentin Tallec, Pierre Richemond, Elena  
406 Buchatskaya, Carl Doersch, Bernardo Avila Pires, Zhaohan Guo, Mohammad Gheshlaghi Azar,  
407 et al. Bootstrap your own latent—a new approach to self-supervised learning. *Advances in Neural  
408 Information Processing Systems*, 33:21271–21284, 2020.
- 409 [21] Raia Hadsell, Sumit Chopra, and Yann LeCun. Dimensionality reduction by learning an  
410 invariant mapping. *2006 IEEE Computer Society Conference on Computer Vision and Pattern  
411 Recognition (CVPR’06)*, 2:1735–1742, 2006.
- 412 [22] Jeff Z. HaoChen, Colin Wei, Adrien Gaidon, and Tengyu Ma. Provable guarantees for self-  
413 supervised deep learning with spectral contrastive loss. In *NeurIPS*, 2021.
- 414 [23] Kaiming He, Haoqi Fan, Yuxin Wu, Saining Xie, and Ross B. Girshick. Momentum contrast for  
415 unsupervised visual representation learning. *2020 IEEE/CVF Conference on Computer Vision  
416 and Pattern Recognition (CVPR)*, pages 9726–9735, 2020.
- 417 [24] Katherine L. Hermann and Andrew Kyle Lampinen. What shapes feature representations?  
418 exploring datasets, architectures, and training. *ArXiv*, abs/2006.12433, 2020.
- 419 [25] Jordan Hoffmann, Sebastian Borgeaud, Arthur Mensch, Elena Buchatskaya, Trevor Cai, Eliza  
420 Rutherford, Diego de Las Casas, Lisa Anne Hendricks, Johannes Welbl, Aidan Clark, Tom  
421 Hennigan, Eric Noland, Katie Millican, George van den Driessche, Bogdan Damoc, Aurelia  
422 Guy, Simon Osindero, Karen Simonyan, Erich Elsen, Jack W. Rae, Oriol Vinyals, and L. Sifre.  
423 Training compute-optimal large language models. *ArXiv*, abs/2203.15556, 2022.
- 424 [26] A. Tarun Karthik, Mike Wu, Noah D. Goodman, and Alex Tamkin. Tradeoffs between con-  
425 trastive and supervised learning: An empirical study. *ArXiv*, abs/2112.05340, 2021.

- [27] Eugene Kharitonov, Morgane Rivi re, Gabriel Synnaeve, Lior Wolf, Pierre-Emmanuel Mazar , Matthijs Douze, and Emmanuel Dupoux. Data augmenting contrastive learning of speech representations in the time domain. In *2021 IEEE Spoken Language Technology Workshop (SLT)*, pages 215–222. IEEE, 2021.
- [28] Alex Krizhevsky. Learning multiple layers of features from tiny images. Technical report, 2009.
- [29] Tianhong Li, Lijie Fan, Yuan Yuan, Hao He, Yonglong Tian, Rog rio Schmidt Feris, Piotr Indyk, and Dina Katabi. Addressing feature suppression in unsupervised visual representations. 2020.
- [30] Yuanzhi Li, Colin Wei, and Tengyu Ma. Towards explaining the regularization effect of initial large learning rate in training neural networks. *ArXiv*, abs/1907.04595, 2019.
- [31] Yinhan Liu, Myle Ott, Naman Goyal, Jingfei Du, Mandar Joshi, Danqi Chen, Omer Levy, Mike Lewis, Luke Zettlemoyer, and Veselin Stoyanov. Roberta: A robustly optimized bert pretraining approach. *ArXiv*, abs/1907.11692, 2019.
- [32] Ziwei Liu, Ping Luo, Xiaogang Wang, and Xiaoou Tang. Deep learning face attributes in the wild. In *ICCV*, pages 3730–3738. IEEE Computer Society, 2015. ISBN 978-1-4673-8391-2. URL <http://dblp.uni-trier.de/db/conf/iccv/iccv2015.html#LiuLWT15>.
- [33] Matthias Minderer, Olivier Bachem, Neil Houlsby, and Michael Tschannen. Automatic shortcut removal for self-supervised representation learning. In *ICML*, 2020.
- [34] Ishan Misra and Laurens van der Maaten. Self-supervised learning of pretext-invariant representations. *2020 IEEE/CVF Conference on Computer Vision and Pattern Recognition (CVPR)*, pages 6706–6716, 2020.
- [35] Daniel S Park, William Chan, Yu Zhang, Chung-Cheng Chiu, Barret Zoph, Ekin D Cubuk, and Quoc V Le. Specaugment: A simple data augmentation method for automatic speech recognition. *arXiv preprint arXiv:1904.08779*, 2019.
- [36] Alec Radford, Jong Wook Kim, Chris Hallacy, Aditya Ramesh, Gabriel Goh, Sandhini Agarwal, Girish Sastry, Amanda Askell, Pamela Mishkin, Jack Clark, et al. Learning transferable visual models from natural language supervision. In *International Conference on Machine Learning*, pages 8748–8763. PMLR, 2021.
- [37] Aditya Ramesh, Mikhail Pavlov, Gabriel Goh, Scott Gray, Chelsea Voss, Alec Radford, Mark Chen, and Ilya Sutskever. Zero-shot text-to-image generation. *ArXiv*, abs/2102.12092, 2021.
- [38] Scott Reed, Konrad Zolna, Emilio Parisotto, Sergio Gomez Colmenarejo, Alexander Novikov, Gabriel Barth-Maron, Mai Gimenez, Yury Sulsky, Jackie Kay, Jost Tobias Springenberg, Tom Eccles, Jake Bruce, Ali Razavi, Ashley Edwards, Nicolas Manfred Otto Heess, Yutian Chen, Raia Hadsell, Oriol Vinyals, Mahyar Bordbar, and Nando de Freitas. A generalist agent. *ArXiv*, abs/2205.06175, 2022.
- [39] Joshua Robinson, Li Sun, Ke Yu, K. Batmanghelich, Stefanie Jegelka, and Suvrit Sra. Can contrastive learning avoid shortcut solutions? *Advances in neural information processing systems*, 34:4974–4986, 2021.
- [40] Shiori Sagawa, Pang Wei Koh, Tatsunori B. Hashimoto, and Percy Liang. Distributionally robust neural networks for group shifts: On the importance of regularization for worst-case generalization. *ArXiv*, abs/1911.08731, 2019.
- [41] Shiori Sagawa, Aditi Raghunathan, Pang Wei Koh, and Percy Liang. An investigation of why overparameterization exacerbates spurious correlations. *ArXiv*, abs/2005.04345, 2020.
- [42] Fatemeh Saki and Nasser Kehtarnavaz. Automatic switching between noise classification and speech enhancement for hearing aid devices. In *2016 38th Annual International Conference of the IEEE Engineering in Medicine and Biology Society (EMBC)*, pages 736–739, 2016. doi: 10.1109/EMBC.2016.7590807.

- [43] Fatemeh Saki, Abhishek Sehgal, Issa Panahi, and Nasser Kehtarnavaz. Smartphone-based real-time classification of noise signals using subband features and random forest classifier. In *2016 IEEE International Conference on Acoustics, Speech and Signal Processing (ICASSP)*, pages 2204–2208, 2016. doi: 10.1109/ICASSP.2016.7472068.
- [44] Harshay Shah, Kaustav Tamuly, Aditi Raghunathan, Prateek Jain, and Praneeth Netrapalli. The pitfalls of simplicity bias in neural networks. *ArXiv*, abs/2006.07710, 2020.
- [45] Herbert A Simon. Spurious correlation: A causal interpretation. *Journal of the American statistical Association*, 49(267):467–479, 1954.
- [46] Megha Srivastava, Tatsunori B. Hashimoto, and Percy Liang. Robustness to spurious correlations via human annotations. In *ICML*, 2020.
- [47] Alex Tamkin, Dan Jurafsky, and Noah Goodman. Language through a prism: A spectral approach for multiscale language representations. *Advances in Neural Information Processing Systems*, 33:5492–5504, 2020.
- [48] Alex Tamkin, Vincent Liu, Rongfei Lu, Daniel E Fein, Colin Schultz, and Noah D. Goodman. Dabs: A domain-agnostic benchmark for self-supervised learning. *ArXiv*, abs/2111.12062, 2021.
- [49] Alex Tamkin, Mike Wu, and Noah D. Goodman. Viewmaker networks: Learning views for unsupervised representation learning. *ArXiv*, abs/2010.07432, 2021.
- [50] Alex Tamkin, Gaurab Banerjee, Mohamed Owda, Vincent Liu, Shashank Rammoorthy, and Noah Goodman. Dabs 2.0: Improved datasets and algorithms for universal self-supervision. 2022.
- [51] Alex Tamkin, Dat Nguyen, Salil Deshpande, Jesse Mu, and Noah Goodman. Active learning helps pretrained models learn the intended task. *arXiv preprint arXiv:2204.08491*, 2022.
- [52] Yonglong Tian, Chen Sun, Ben Poole, Dilip Krishnan, Cordelia Schmid, and Phillip Isola. What makes for good views for contrastive learning. *ArXiv*, abs/2005.10243, 2020.
- [53] Lifu Tu, Garima Lalwani, Spandana Gella, and He He. An empirical study on robustness to spurious correlations using pre-trained language models. *Transactions of the Association for Computational Linguistics*, 8:621–633, 2020.
- [54] Yifei Wang, Qi Zhang, Yisen Wang, Jiansheng Yang, and Zhouchen Lin. Chaos is a ladder: A new theoretical understanding of contrastive learning via augmentation overlap. *arXiv preprint arXiv:2203.13457*, 2022.
- [55] Zhirong Wu, Yuanjun Xiong, Stella X. Yu, and Dahua Lin. Unsupervised feature learning via non-parametric instance discrimination. *2018 IEEE/CVF Conference on Computer Vision and Pattern Recognition*, pages 3733–3742, 2018.
- [56] Kai Y. Xiao, Logan Engstrom, Andrew Ilyas, and Aleksander Madry. Noise or signal: The role of image backgrounds in object recognition. *ArXiv*, abs/2006.09994, 2021.
- [57] Xingyi Yang, Xuehai He, Yuxiao Liang, Yue Yang, Shanghang Zhang, and Pengtao Xie. Transfer learning or self-supervised learning? a tale of two pretraining paradigms. *ArXiv*, abs/2007.04234, 2020.
- [58] Nanxuan Zhao, Zhirong Wu, Rynson W. H. Lau, and Stephen Lin. What makes instance discrimination good for transfer learning? *ArXiv*, abs/2006.06606, 2021.

## A Code release

We have included our codebase in the supplementary materials and will make it publicly available.

## B Manual feature dropout experiments

In Figure 4 we plot the linear probing accuracy after contrastive learning with varying rates of dropout of the synthetic feature. In all cases, we see a clear tradeoff between features, where dropping out the synthetic feature improves learning of the object class.

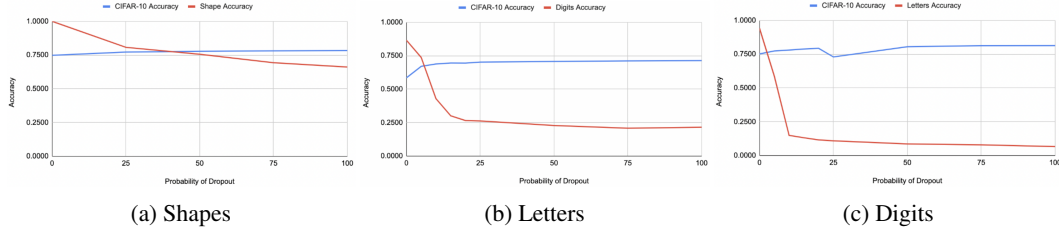

Figure 4: Linear probing accuracy (y-axis) after contrastive learning with varying rates of dropout of the synthetic feature (x-axis). In all cases, we see a clear tradeoff between features, where dropping out the synthetic feature improves learning of the object class.

## C Formalization of observation in Section 2

**Definition C.1** (Invariance). *A function  $f : \mathbb{R}^m \rightarrow \mathbb{R}^n$  is invariant to a set of transformations  $G$  if and only if  $f \circ g(x) = f(x)$  for all  $x \in \mathbb{R}^m$  and for all  $g \in G$ .*

**Definition C.2** (Augmentation collision). *An augmentation collision occurs if, for two inputs  $x_a, x_b$  and set of transformations  $G$ , there exist  $g_a^{(1)}, \dots, g_a^{(n_a)}, g_b^{(1)}, \dots, g_b^{(n_b)} \in G$  for some  $n_a, n_b \in \mathbb{N}$  such that  $g_a^{(1)} \circ \dots \circ g_a^{(n_a)}(x_a) = g_b^{(1)} \circ \dots \circ g_b^{(n_b)}(x_b)$ .*

**Observation C.3.** *If there exists an augmentation collision for inputs  $x_a, x_b$  and transformation set  $G$ , and  $f$  is invariant to  $G$ , then  $f(x_a) = f(x_b)$ .*

*Proof.* By the definition of an augmentation collision,  $g_a^{(1)} \circ \dots \circ g_a^{(n_a)}(x_a) = g_b^{(1)} \circ \dots \circ g_b^{(n_b)}(x_b)$ . By the definition of a function, we have  $f \circ g_a^{(1)} \circ \dots \circ g_a^{(n_a)}(x_a) = f \circ g_b^{(1)} \circ \dots \circ g_b^{(n_b)}(x_b)$ . Applying invariance, we obtain  $f(x_a) = f(x_b)$ .  $\square$

Applying this observation, we observe that if the downstream labeling function  $f$  is invariant to a class of augmentations, then there cannot be an augmentation collision for inputs with different labels. However, common augmentations such as brightness shifts can reduce any image to a black or white image, resulting in an augmentation collapse between any two inputs.

## D Additional feature dropout experiments

### D.1 Quantifying the importance of feature dropout

To assess the importance of label-destroying augmentations to the success of the viewmaker, we experiment with a setup where the viewmaker cannot destroy the information in the object class. To do this, we compute a mask around the object and zero out any perturbation from the viewmaker within that mask. We then perform pretraining and transfer as usual.

As we report in Table 3, the accuracy of the CIFAR-10 class label drops precipitously, as expected. At the same time, the accuracy of two of the other objects remains mostly constant (shape and digits), while the accuracy for letters declines modestly (perhaps because the color of the letter is now able to suppress the learning of the letter class).

|          | Viewmaker (C-10) | Mask-Viewmaker (C-10) | Viewmaker (Object) | Mask-Viewmaker (Object) |
|----------|------------------|-----------------------|--------------------|-------------------------|
| C+Shape  | 79.8             | 26.0                  | 100.0              | 95.8                    |
| C+Digit  | 69.3             | 50.7                  | 94.3               | 95.0                    |
| C+Letter | 71.9             | 23.2                  | 96.9               | 71.8                    |

Table 3: **Experiments with a masked viewmaker which is unable to destroy the object class.** Transfer accuracy on CIFAR-10 (C-10) and the object task (Shape, Digit, or Letter). The Mask-Viewmaker has its perturbation masked such that it cannot destroy the label of the object. This results in the features in the object suppressing the CIFAR-10 accuracy, while leaving the object accuracy relatively unscathed.

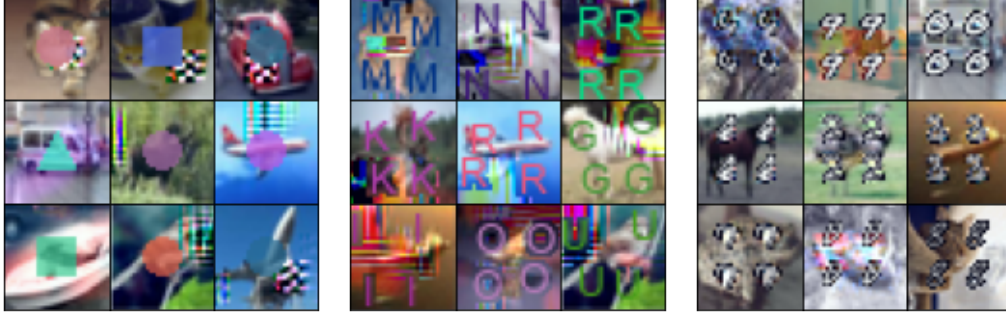

Figure 5: Non-label destroying Viewmaker perturbation examples.

## 544 D.2 Quantifying the degree of feature dropout

545 We perform an exploratory analysis to testing how well different views drop out the features in  
546 an input. We augment a 1,200 examples (CIFAR-10 image plus an overlaid object) using a given  
547 augmentation policy (either the expert or viewmaker augmentations). We then encode the model with  
548 a classifier trained off of the other augmentation policy (i.e. expert for viewmaker augmentations  
549 or the reverse) in order to test how well the augmentations drop out the features. We use a different  
550 encoder to see the effects of the augmentations prior to the encoder having a chance to adapt to them.

551 We observe a bimodal behavior for the viewmaker views, shown in Figure 6, suggesting that the  
552 model is adapting to the semantics of the input and has learned to stochastically drop out the simple  
553 feature some fraction of the time. By contrast, the expert views display no such structure. Using the  
554 corresponding encoder and views leads to models performing uniformly well, as shown in Figure 7.

## 555 D.3 Additional visualizations for CelebA

556 We show feature dropout histograms for CelebA for each of the 40 features in Figure 9. The  
557 prevalence of bimodal distributions demonstrates a high degree of feature dropout across attributes.  
558 Histograms shown are viewmaker augmentations on an encoder trained with expert views.

559 We also show views and diffs for CelebA in Figure 8. These views show a high degree of sensitivity  
560 to the input semantics, and appear to modify characteristics such as the background, hair color, and  
561 facial features.

## 562 E End-to-end Simulations of Linear Setting

563 We empirically test the performance of the full trajectory of gradient descent when we add noise to  
564 the data. We study a setting with one weak feature with correlations coefficient  $\alpha_1 \leq 0.5$ , and 50  
565 dominant features with  $\alpha_k = 1$  for  $k = 2, \dots, 51$ . We compare two approaches run on the same  
566 data: in the first approach, we run 150 iterations of GD without adding noise. In the second, we run  
567 50 iterations of GD without noise, and then add noise to the dominant features for the remaining 100  
568 iterations.

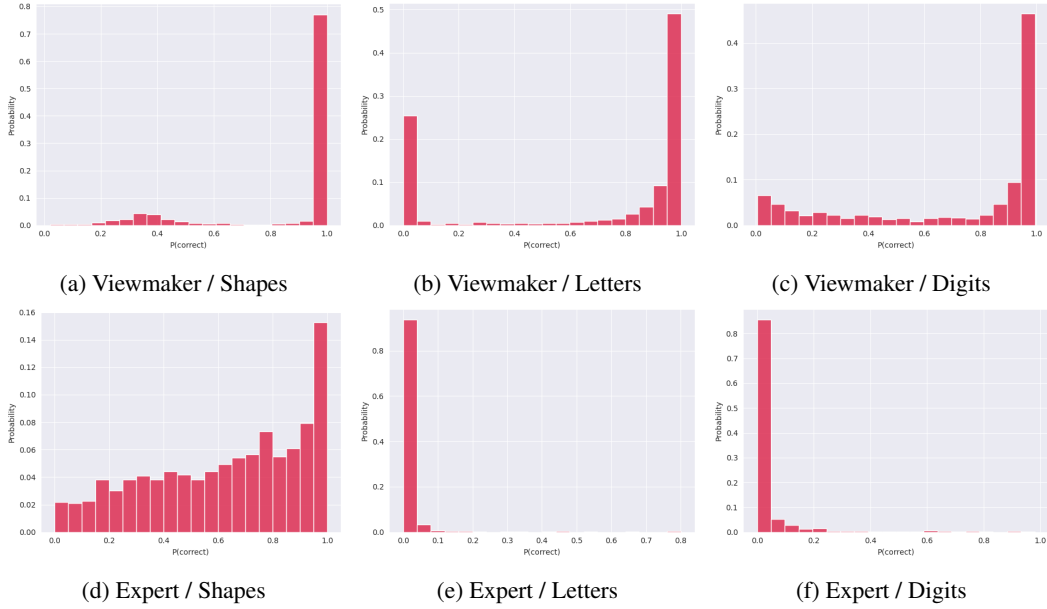

Figure 6: **Viewmaker augmentations stochastically drop out simple features added to the input.** Probability of the correct answer for different augmentations (Viewmaker or Expert) and different examples from different datasets (Shapes, Letters, Digits). Each histogram shows a single example from each dataset randomly augmented 1200 times, and the corresponding probabilities of the correct answer. The viewmaker augmentations display a bimodal structure, indicating that the simple feature is selectively either destroyed or preserved. The expert augmentations by contrast lack such structure, reflecting their lack of adaptation to the structure of each input.

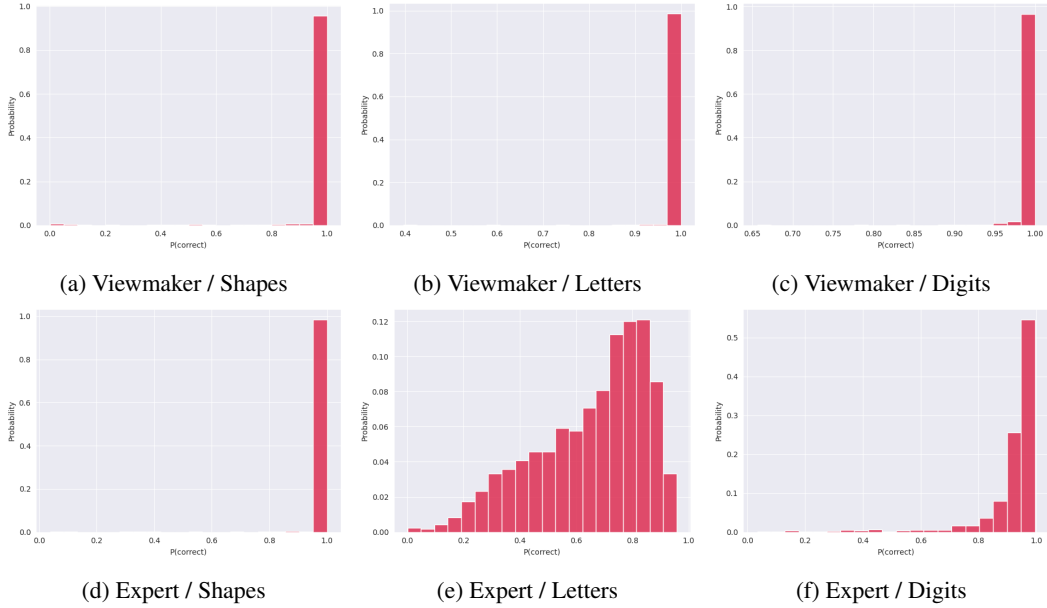

Figure 7: **Evaluating views with their respective encoder does not reveal bimodal structure for viewmaker or expert views.** Details are the same as in Figure 6, with the exception that views are evaluated on their corresponding encoder.



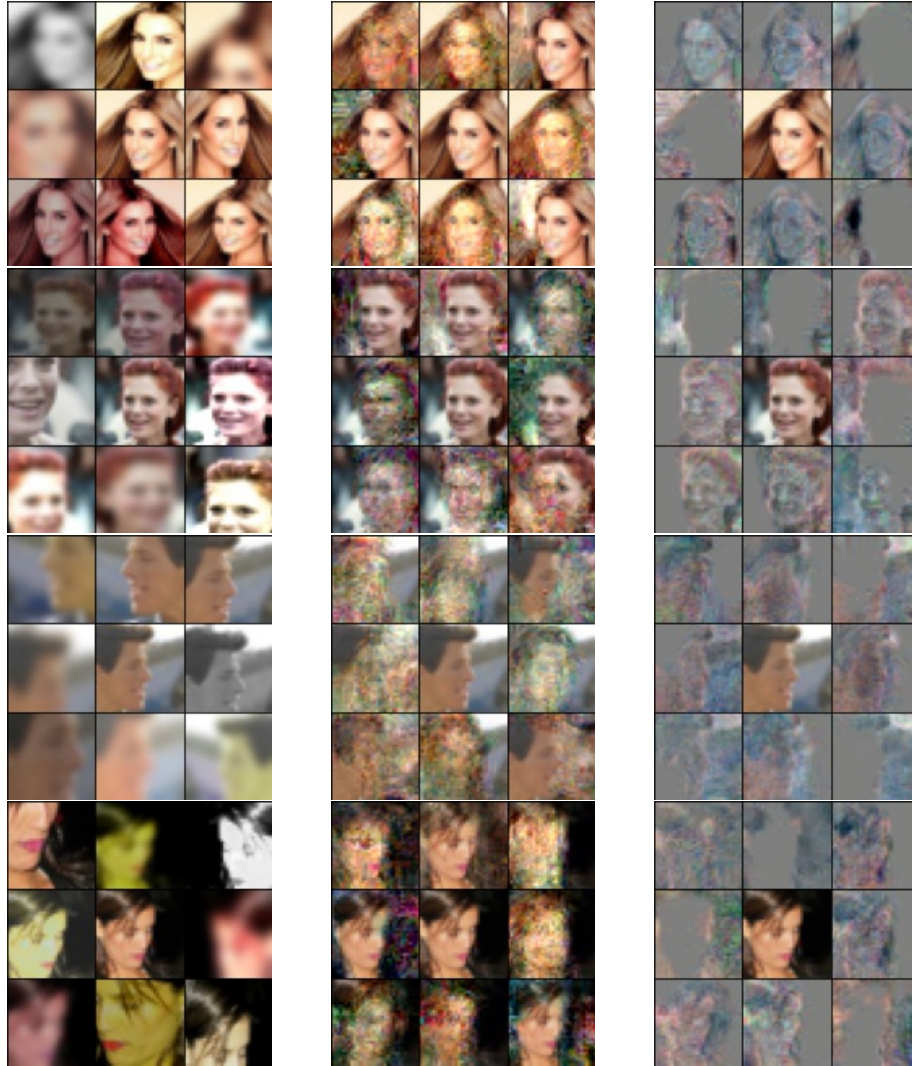

Figure 8: **Comparison of viewmaker and expert augmentations on CelebA.** The viewmaker augmentations adapt to the particular semantics of the input data, and make targeted perturbations that alter features such as facial features, hair color, background, and skin tone. *Columns* (from left): Expert augmentations, viewmaker augmentations, difference between original and viewmaker augmentation, rescaled to  $[0,1]$ . Center image in each grid is the original.

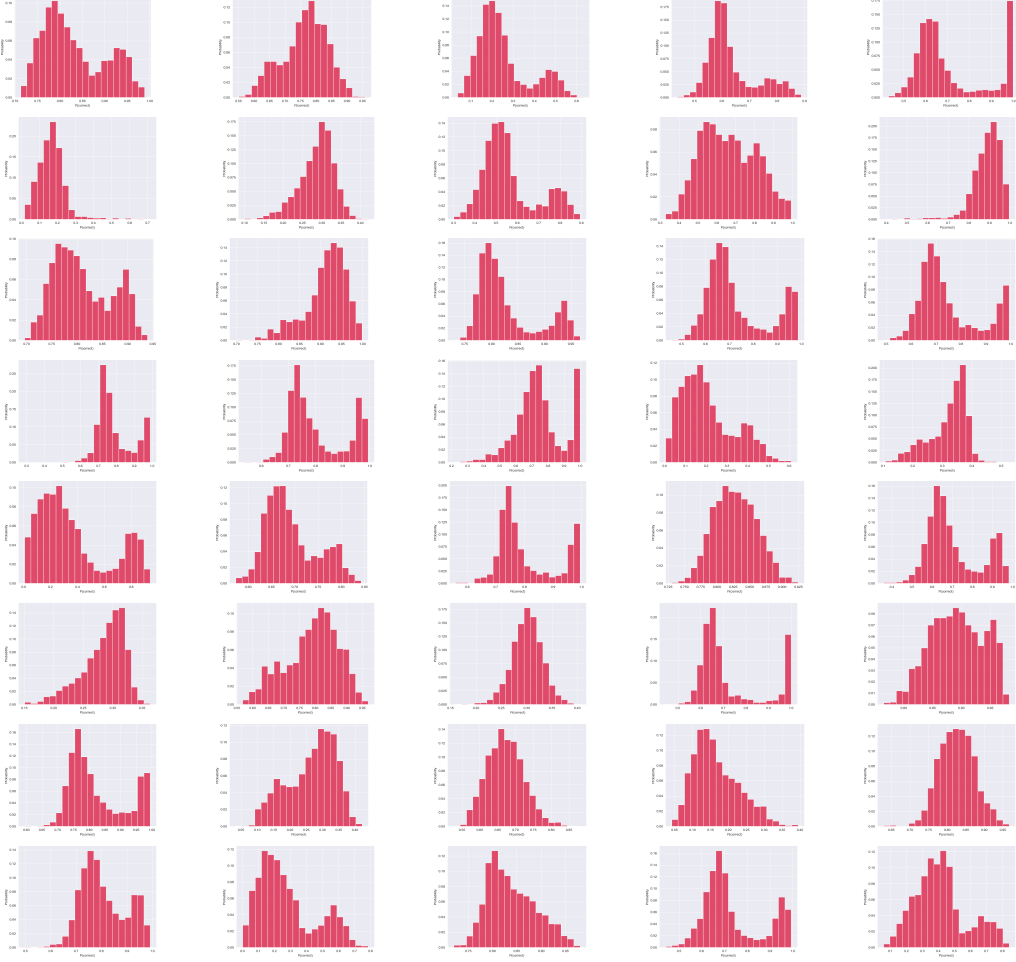

Figure 9: **Three-quarters of Celeb-A features are dropped out by viewmaker.** Accuracy of a linear classifier trained on expert images and evaluated on 2000 different augmentations of different images. Over two-thirds of the features exhibit a bimodal structure, indicating feature dropout by the viewmaker augmentations.

569 In Figure 10(top), we compare the alignment of Feature 1 (the weak feature) and Feature 2 (one  
570 of the dominant features) to the ground truth in the two approaches. We observe that adding noise  
571 consistently accelerates the learning of the weak feature (blue), with little cost to the dominant  
572 features (red). The affect is consistent among many choices for  $\alpha_1$ , the correlation coefficient of the  
573 weak feature. We also plot in Figure 10(bottom) the probability of predicting the correct class (pair)  
574 of the view under both approaches. We observe that this probability drops sharply when we add noise,  
575 which we believe is the mechanism for faster learning with noise.

576 We remark that we chose to add noise to all the dominant features (instead of a single  $k'$  a in our  
577 theorem) to accentuate the effect of adding noise. We observed a similar effect, but smaller, when we  
578 added noise to fewer features, or when there were fewer than 50 dominant features.

## 579 F Full proofs of propositions and theorems

580 We begin by stating and proving Lemma F.1 on the downstream classification accuracy.

581 **Lemma F.1** (Downstream classification accuracy). *Suppose we draw labeled data points  $(u, y) \in$   
582  $\mathbb{R}^{K \times d} \times \{+1, 1\}$ , where as before,  $u_k \sim \mathcal{N}(0, I_d)$  for  $k \in [K]$ , and the label is given by  $\text{sign}(u_k^T \mu_k)$ .  
583 Then the best linear classifier  $\mathbf{a} \in \mathbb{R}^K$  on the representations  $f_\Theta(u) \in \mathbb{R}^K$  achieves a test error of*

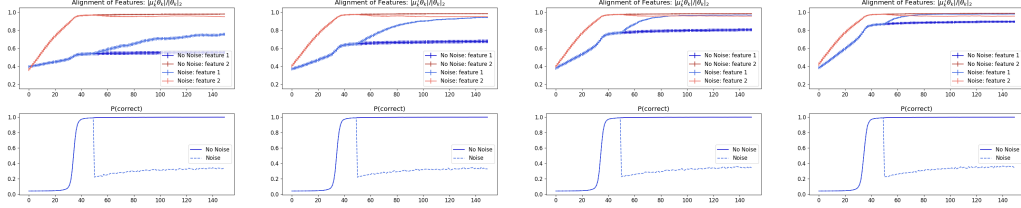

Figure 10: Alignment of features with verses without added noise. From left to right:  $\alpha_1 = 0.125, 0.25, 0.375, 0.5$ . The top plots show the alignment of Features 1 (weak) and 2 (dominant) to the ground truth; the bottom plots shows the probability of predicting the correct augmentation pair from the batch. Standard deviation bars are shown for the mean alignment over 200 runs. We used dimension  $d = 5$ , and a batch size of  $m = 25$ .

584  $\frac{1}{\pi} \arccos \left( \frac{|\mu_k^T \theta_k|}{\|\theta_k\|_2} \right)$ . That is

$$\min_{\mathbf{a} \in \mathbb{R}^K} \Pr_u [\text{sign}(\mathbf{a}^T f_\Theta(u)) \neq \text{sign}(\mu_k^T u_k)] = \frac{\arccos \left( \frac{|\mu_k^T \theta_k|}{\|\theta_k\|_2} \right)}{\pi}. \quad (1)$$

585 Thus if  $\theta_k$  and  $\mu_k$  are orthogonal, then the test error is 50%. If the angle between  $\theta_k$  and the  $\pm \mu_k$  is  
586 zero, then we achieve perfect classification accuracy.

587 *Proof.* It is easy to see that the best linear classifier  $\mathbf{a}$  will (up to scaling) be equal to the  
588 vector  $\text{sign}(\mu_k^T \theta_k) e_k$ . Such a classifier predicts the correct sign whenever  $\text{sign}(\mathbf{a}^T f_\Theta(u)) =$   
589  $\text{sign}(\mu_k^T \theta_k) \text{sign}(\theta_k^T u_k)$  equals  $\text{sign}(\mu_k^T u_k)$ , which occurs exactly a  $1 - \frac{\arccos \left( \frac{|\mu_k^T \theta_k|}{\|\theta_k\|_2} \right)}{\pi}$  fraction  
590 of the time.  $\square$

591 In the rest of this section, we prove our main theoretical result, Theorem 5.1, which shows that  
592  $\arccos \left( \frac{|\mu_k^T \theta_k|}{\|\theta_k\|_2} \right)$  decreases faster in expectation during gradient descent if we add noise to the  $k'$   
593 feature.

## 594 F.1 Notation.

595 We let  $\delta_{ij}$  denote the  $\delta$ -function which equals 1 if  $i = j$  and 0 otherwise. For a parameter  $\Theta =$   
596  $\{\theta_k\}_{k \in [K]}$ , we let  $\theta_k^\parallel := \mu_k \mu_k^T \theta_k$  be the projection of  $\theta_k$  in the  $\mu_k$  direction. We let  $\theta_k^\perp = \theta_k - \theta_k^\parallel$  be  
597 the projection of  $\theta_k$  orthogonal to the feature  $\mu_k$ .

598 Throughout this section, we consider the ground truth directions to be fixed, and we fix some initial  
599 correlation vector  $\alpha$ . We let  $\mathbb{P}_\alpha$  denote the distribution from which the pair  $(u, v)$  is drawn from  
600 the Gaussian distribution described in Section 5 with correlation coefficients  $\alpha$ . When unspecified,  
601 the variables  $U, V$  are drawn from the distribution  $\mathbb{P}_\alpha^m$ . Since we study what happens when we vary  
602  $\alpha_{k'}$ , for  $x \in [0, 1]$ , we use the shorthand  $\mathbb{P}_x$  to denote the distribution  $\mathbb{P}_{\alpha(x)}^m$ , where  $\alpha(x)_{k'} = x$ , and  
603  $\alpha(x)_k = \alpha_k$  for all other  $k$ .

604 We denote  $\mathcal{L}_i(\Theta; U, V) = \text{CE}(\{p_{ij}\}_{j \in [m]}, e_i) = -\log(p_{ii})$ , which we abbreviate by  $\mathcal{L}_i$ . When it is  
605 clear that we are considering  $\mathcal{L}_i$  for some fixed  $i$ , we omit the superscripts on the  $i$ th data point or its  
606 pair. That is, we denote  $u_k := u_k^{(i)}$  and  $v_k := v_k^{(i)}$ .

## 607 F.2 Preliminaries

608 The following facts about of the derivative of the cross entropy loss are easy derived.

**Lemma F.2.**

$$\frac{\partial \mathcal{L}_i}{\partial \Theta} = \sum_j (p_{ij} - \delta_{ij}) \frac{\partial z_{ij}}{\partial \Theta} = \sum_i \sum_{j \neq i} p_{ij} \left( \frac{\partial z_{ij}}{\partial \Theta} - \frac{\partial z_{ii}}{\partial \Theta} \right), \quad (2)$$

609 where

$$\frac{\partial z_{ij}}{\partial \theta_k} = (u_k^{(i)} v_k^{(j)T} + v_k^{(j)} u_k^{(i)T}) \theta_k. \quad (3)$$

610 We will also need the following facts on Gaussian random variables. The first, Stein's Lemma, is  
611 well known.

**Lemma F.3** (Stein's Lemma).

$$\mathbb{E}_{X \sim \mathcal{N}(0, \sigma^2)} [X f(X)] = \sigma^2 \mathbb{E}_{X \sim \mathcal{N}(0, \sigma^2)} [f'(X)]. \quad (4)$$

612 The next two lemmas are proved in Section F.4.

613 **Lemma F.4.** *There exists some constant  $C$  such that following holds. If  $\sigma \leq \frac{1}{C}$ , and  $0 \leq t \leq \frac{1}{\sigma}$ , then  
614 for any  $c \in \{0, 1, 2, 3\}$ , and  $X \sim \mathcal{N}(0, \sigma^2)$  we have*

$$\mathbb{E}_X [|X|^c \exp(t|X|) \exp(tX^2)] \leq C\sigma^c. \quad (5)$$

615 If additionally  $d \in \{0, 1, 2, 3\}$ ,  $\rho \leq \frac{1}{C}$  and  $Y \sim \mathcal{N}(0, \rho^2)$ , then

$$\mathbb{E}_X [|X|^c |Y|^d \exp(t|X|) \exp(|XY|)] \leq C\sigma^c \rho^d. \quad (6)$$

616 **Lemma F.5.** *For some universal constant  $C$ , for any  $\sigma \in [0, 1]$ ,  $t \geq 0$ ,  $c \in \{0, 1, 2, 3, 4\}$ , we have*

$$\mathbb{E}_{X \sim \mathcal{N}(0, \sigma^2)} [(\exp(t|X|) - 1) |X|^c] \leq C t \sigma^c.$$

### 617 F.3 Approach and Lemmas

618 **Intuition for proof of Theorem 5.1.** Our proof involves comparing the gradient of the loss in  
619 the  $\theta_k$  direction,  $\nabla_k := \frac{\partial}{\partial \theta_k} \mathcal{L}$  in the setting with noise to the setting without noise. Loosely, our  
620 goal is to show that for any  $k$ , the projection of the this gradient onto the ground truth direction,  
621  $\mu_k^T \nabla_k \text{sign}(\mu_k^T \theta_k)$ , increases when when increase the noise. The main intuition comes from an  
622 expansion of this gradient in Lemma F.7, which shows that  $\mathbb{E} \mu_k^T \nabla_k \text{sign}(\mu_k^T \theta_k)$  approximately scales  
623 with  $\sum_i (1 - p_{ii})$ . Now observe that  $p_{ii}$ , the probability of correctly matching the  $i$ th view to its  
624 pair, decreases when we add noise to feature  $k'$ . Thus adding noise will increase  $\mu_k^T \nabla_k \text{sign}(\mu_k^T \theta_k)$ ,  
625 thereby improving the alignment.

626 In the remainder of this section, we outline our proof of Theorem 5.1 in this section. We prove all the  
627 lemmas below in Section F.4.

628 To understand  $\mathbb{E}_{U, V} \left[ \arccos \left( \frac{|\mu_k^T \theta_k^{(t+1)}|}{\|\theta_k^{(t+1)}\|_2} \right) \right]$  for a small enough step size, we first claim that it suffices  
629 to understand the expected projection of the gradient with respect to  $\theta_k$  in the  $\mu_k$  direction and in the  
630  $\theta_k$  direction. We use the notation  $\nabla_k = \frac{\partial \mathcal{L}(\Theta; U, V)}{\partial \theta_k}$ .

631 **Lemma F.6.** *Let  $\theta_k^+ = \theta_k - \eta(\nabla_k + \lambda \theta_k)$ . Then*

$$\lim_{\eta \rightarrow 0} \frac{1}{\eta} \left( \mathbb{E}_{U, V} \left[ \arccos \left( \frac{|\mu_k^T \theta_k^+|}{\|\theta_k^+\|_2} \right) \right] - \arccos \left( \frac{|\mu_k^T \theta_k|}{\|\theta_k\|_2} \right) \right) = N \mathbb{E}_{U, V} \left[ -(\mu_k^T \theta_k)(\mu_k^T \nabla_k) + \frac{\theta_k^T \nabla_k (\mu_k^T \theta_k)^2}{\|\theta_k\|_2^2} \right], \quad (7)$$

632 where  $N$  is some negative value that depends only on  $\theta_k$ .

633 Now, since we care about the quantity  $\mathbb{E}_{U, V} \left[ \arccos \left( \frac{|\mu_k^T \theta_k^{(t+1)}|}{\|\theta_k^{(t+1)}\|_2} \right) \right] - \mathbb{E}_{U, \tilde{V}} \left[ \arccos \left( \frac{|\mu_k^T \tilde{\theta}_k^{(t+1)}|}{\|\tilde{\theta}_k^{(t+1)}\|_2} \right) \right]$   
634 being positive, it suffices to show that derivative

$$\frac{d}{dx} \mathbb{E}_{U, V \sim \mathbb{P}_x} \left[ -(\mu_k^T \theta_k)(\mu_k^T \nabla_k) + \frac{\theta_k^T \nabla_k (\mu_k^T \theta_k)^2}{\|\theta_k\|_2^2} \right],$$

635 is negative for all  $x \in [\tilde{\alpha}_{k'}, \alpha_{k'}]$ . Indeed, from Lemma F.6, we have that

$$\lim_{\eta \rightarrow 0} \frac{1}{\eta} \left( \mathbb{E}_{U, V \sim \mathbb{P}_{\alpha_{k'}}} \left[ \arccos \left( \frac{|\mu_k^T \theta_k^+|}{\|\theta_k^+\|_2} \right) \right] - \mathbb{E}_{U, V \sim \mathbb{P}_{\tilde{\alpha}_{k'}}} \left[ \arccos \left( \frac{|\mu_k^T \theta_k|}{\|\theta_k\|_2} \right) \right] \right) \quad (8)$$

$$= N \int_{\tilde{\alpha}_{k'}}^{\alpha_{k'}} \frac{d}{dx} \mathbb{E}_{U, V \sim \mathbb{P}_x} \left[ -(\mu_k^T \theta_k)(\mu_k^T \nabla_k) + \frac{\theta_k^T \nabla_k (\mu_k^T \theta_k)^2}{\|\theta_k\|_2^2} \right] dx, \quad (9)$$

so if the derivative is negative for the full range, then the difference in arccosines is positive.

In the following lemma we compute the derivative of  $\mathbb{E}[\nabla_k]$  with respect to  $x$ .

**Lemma F.7.**

$$\begin{aligned} \frac{d}{dx} \mathbb{E}_{U,V \sim \mathbb{P}_x} [\nabla_k] &= m \frac{d}{dx} \mathbb{E}_{U,V \sim \mathbb{P}_x} \left[ \frac{\partial \mathcal{L}_i}{\partial \theta_k} \right] \\ &= \frac{-m}{1-x^2} \theta_k^T \mu_{k'} \sum_{j \neq i} \mathbb{E}_{U,V \sim \mathbb{P}_x} \left[ p_{ij} p_{ii} (\theta_{k'}^T u_{k'}) \left( \mu_{k'}^T u_{k'}^{(i)} - x \mu_{k'}^T v_{k'}^{(i)} \right) \left( \frac{\partial(z_{ij} - z_{ii})}{\partial \theta_k} \right) \right]. \end{aligned}$$

We will analyze this quantity by explicitly taking the expectation with respect to some set of random variables. Let  $S = \{U_k, V_k, U_{k'}, V_{k'}\}$  consist of the random variables  $u_{k'}^{(i)}, u_k^{(i)}$ , and  $v_{k'}^{(i)}, v_k^{(i)}$  for all  $i \in [m]$ . Define  $q_{ij}$  to be the logits when all variables in  $S$  are set to 0 (Thus explicitly,  $q_{ij} = \frac{\exp(\sum_{\tilde{k} \neq k, k'} \theta_{\tilde{k}}^T u_{\tilde{k}}^{(i)} \theta_{\tilde{k}}^T v_{\tilde{k}}^{(j)})}{\sum_{j'} \exp(\sum_{\tilde{k} \neq k, k'} \theta_{\tilde{k}}^T u_{\tilde{k}}^{(i)} \theta_{\tilde{k}}^T v_{\tilde{k}}^{(j')})}$ ). We will use the notation  $j \sim q$  to denote the distribution on  $[m]$  with mass  $q_{ij}$  on  $j$ .

Let

$$h(S) := (\theta_{k'}^T u_{k'}) \left( \mu_{k'}^T u_{k'}^{(i)} - x \mu_{k'}^T v_{k'}^{(i)} \right) \left( \frac{\partial(z_{ij} - z_{ii})}{\partial \theta_k} \right), \quad (10)$$

and

$$h_1(S) = (\theta_{k'}^T u_{k'}) \left( (1-x^2) \mu_{k'}^T u_{k'}^{(i)} \right) 2\alpha_k \left( (\mu_k^T u_k) (\theta_k^{\parallel} u_k) \mu_k^T \right), \quad (11)$$

which are the terms that appear in the right hand side of Lemma F.7 after  $p_{ii} p_{ij}$ . Observe that

$$\mathbb{E}_S [h(S) - h_1(S)] = 0.$$

The following four lemmas serve to bound  $\frac{d}{dx} \mathbb{E}_S [\mu_k^T \nabla_k]$  and  $\frac{d}{dx} \mathbb{E}_S [\theta_k^T \nabla_k]$ . We call the terms of the form  $\mathbb{E} p_{ii} p_{ij} (h(S) - h_1(S))$  “junk” terms, and our goal will be to show that these terms are small. We will control more closely the terms of the form  $\mathbb{E} p_{ii} p_{ij} (h_1(S))$ .

**Lemma F.8** (Junk Terms for  $\mu_k$  term.). *If  $\|\theta_k\| \leq 1$  and  $\|\theta_{k'}\| \leq 1$ , then for some universal constant  $C$*

$$|\mathbb{E}_S [p_{ii} p_{ij} \mu_k^T (h(S) - h_1(S))]| \leq C q_{ii} q_{ij} \left( \|\theta_{k'}\|^3 \|\theta_k\|^3 + \|\theta_{k'}^{\parallel}\| \|\theta_k\|^3 + \alpha_k \left( \|\theta_{k'}\|^3 \|\theta_k^{\parallel}\| \right) \right).$$

**Lemma F.9** (Good Term for  $\mu_k$  term.). *If  $\|\theta_k\| \leq 1$  and  $\|\theta_{k'}\| \leq 1$ , then for some universal constant  $C$*

$$|\mathbb{E}_S [p_{ii} p_{ij} \mu_k^T h_1(S)]| \geq 2\alpha_k (1-x^2) q_{ii} q_{ij} \left( \|\theta_{k'}^{\parallel}\| \|\theta_k^{\parallel}\| \right) (1 - C(\|\theta_{k'}\|^2 + \|\theta_k\|^2)).$$

Plugging these two lemmas into Lemma F.7 yields the following corollary.

**Corollary F.9.1** (Total  $\mu_k$  term.). *If for a sufficiently large constant  $C$ ,  $|\theta_k^T \mu_k| \leq \frac{1-\alpha_{k'}^2}{C} \|\theta_k\|$ ,  $\|\theta_{k'}\|^3 \leq |\theta_{k'}^T \mu_k|$ , and  $\|\theta_k\|^2 \leq \frac{\alpha_k(1-\alpha_{k'}^2)}{C}$ , then*

$$(\mu_k^T \theta_k) \frac{d}{dx} \mathbb{E}_{\mathbb{P}_x} [\mu_k^T \nabla_k] \geq \frac{m}{2} \mathbb{E}_{U,V \sim S} \left[ \sum_{i,j} q_{ii} q_{ij} 2\alpha_k \|\theta_{k'}^{\parallel}\|^2 \|\theta_k^{\parallel}\|^2 \right].$$

**Lemma F.10** (Junk Terms for  $\theta_k$  term.). *If  $\|\theta_k\| \leq 1$  and  $\|\theta_{k'}\| \leq 1$ , then for some universal constant  $C$*

$$|\mathbb{E}_S [p_{ii} p_{ij} \theta_k^T (h(S) - h_1(S))]| \leq C q_{ii} q_{ij} \left( \|\theta_{k'}\|^3 \|\theta_k\|^4 + \|\theta_{k'}^{\parallel}\| \|\theta_k\|^4 + \alpha_k \left( \|\theta_{k'}\|^3 \|\theta_k\| \|\theta_k^{\parallel}\| + \|\theta_{k'}^{\parallel}\| \|\theta_k\|^3 \|\theta_k^{\parallel}\| \right) \right).$$

**Lemma F.11** (Good Term for  $\theta_k$  term.). *If  $\|\theta_k\| \leq 1$  and  $\|\theta_{k'}\| \leq 1$ , then for some universal constant  $C$*

$$|\mathbb{E}_S [p_{ii} p_{ij} \theta_k^T h_1(S)]| \leq (1-x^2) 2\alpha_k q_{ii} q_{ij} \left( \|\theta_{k'}^{\parallel}\| \|\theta_k^{\parallel}\|^2 \right) (1 + C(\|\theta_{k'}\|^2 + \|\theta_k\|^2)).$$

659 Plugging these two lemmas into Lemma F.7 yields the following corollary.

660 **Corollary F.11.1** (Total  $\theta_k$  term.). *If for a sufficiently large constant  $C$ ,  $\|\theta_k^\parallel\| \leq \frac{1-x^2}{C}\|\theta_k\|$ ,  $\|\theta_{k'}\|^3 \leq$   
661  $\|\theta_{k'}^\parallel\|$ ,  $\|\theta_k\|^2 \leq \frac{\alpha_k(1-x^2)}{C}$ , then*

$$\frac{(\mu_k^T \theta_k)^2}{\|\theta_k\|^2} \left| \frac{d}{dx} \mathbb{E}_{\mathbb{P}_x} [\theta_k^T \nabla_k] \right| \leq \frac{m}{2} \mathbb{E}_{U, V \setminus S} \left[ \sum_{i,j} q_{ii} q_{ij} \alpha_k \|\theta_{k'}^\parallel\|^2 \|\theta_k^\parallel\|^2 \right].$$

662 Combining Corollaries F.9.1 and F.11.1, we obtain the following lemma.

663 **Lemma F.12.** *If for a sufficiently large constant  $C$ ,  $\|\theta_k^\parallel\| \leq \frac{1-x^2}{C}\|\theta_k\|$ ,  $\|\theta_{k'}\|^3 \leq \|\theta_{k'}^\parallel\|$ ,  $\|\theta_k\|^2 \leq$   
664  $\frac{\alpha_k(1-x^2)}{C}$ , then*

$$\mathbb{E}_{U, V \sim \mathbb{P}_x} \left[ -(\mu_k^T \theta_k)(\mu_k^T \nabla_k) + \frac{\theta_k^T \nabla_k (\mu_k^T \theta_k)^2}{\|\theta_k\|_2^2} \right] < 0. \quad (12)$$

665 Theorem 5.1 now follows.

## 666 F.4 Proofs of Lemmas

667 To prove the Lemmas F.4 and F.5, we will use the following well-known formula for the moment  
668 generating function (MGF) of the half-normal distribution.

**Lemma F.13** (MGF of half-normal distribution). *The MGF of the half-normal distribution is*

$$\mathbb{E}_{X \sim \mathcal{N}(0,1)|X>0} [e^{t|X|}] = 2e^{t^2/2} \Phi(t),$$

669 where  $\Phi(t)$  is the cumulative distribution of a normal random variable.

*Proof of Lemma F.4.*

$$\begin{aligned} \mathbb{E}_X [|X|^c \exp(t|X|) \exp(tX^2)] &= \frac{1}{\sigma\sqrt{2\pi}} \int_{-\infty}^{\infty} |x|^c \exp(t|x|) \exp(tx^2) \exp\left(-\frac{x^2}{2\sigma^2}\right) dx \\ &= \frac{\sqrt{1-2\sigma^2 t}}{\left(\frac{\sigma}{\sqrt{1-2\sigma^2 t}}\right) \sqrt{2\pi}} \int_{-\infty}^{\infty} |x|^c \exp(t|x|) \exp\left(-\frac{x^2}{2\left(\frac{\sigma}{\sqrt{1-2\sigma^2 t}}\right)^2}\right) dx \\ &= \sqrt{1-2\sigma^2 t} \mathbb{E}_{Z \sim \mathcal{N}(0,r)|Z \geq 0} [Z^c \exp(tZ)], \end{aligned}$$

670 where  $r = \frac{\sigma}{\sqrt{1-2\sigma^2 t}}$ . To evaluate this, we use the MGF of the half-normal distribution in Lemma F.13.

671 Thus for some constant  $C$ , for all  $c \in \{1, 2, 3, 4\}$ ,

$$\begin{aligned} \mathbb{E}_{X \sim \mathcal{N}(0,1)|X>0} [c! |X|^c e^{t|X|}] &\leq \mathbb{E}_{X \sim \mathcal{N}(0,1)|X>0} \left[ \frac{d^c}{dt^c} e^{t|X|} \right] \\ &\leq C (1+t^c) e^{t^2/2}. \end{aligned}$$

672 So for some constant  $C$  (whose value changes throughout this equation), so long as  $\sigma \leq \frac{1}{C}$ ,

$$\begin{aligned} \sqrt{1-2\sigma^2 t} \mathbb{E}_{Z \sim \mathcal{N}(0,r)|Z \geq 0} [Z^c \exp(tZ)] &= \sqrt{1-2\sigma^2 t} \mathbb{E}_{X \sim \mathcal{N}(0,1)|Z \geq 0} [r^c Z^c \exp(rtZ)] \\ &\leq \sqrt{1-2\sigma^2 t} C r^c (1+(tr)^c) e^{(tr)^2/2} \\ &\leq C \sigma^c. \end{aligned}$$

673 This proves the first statement in the lemma. To prove the second, we first take the expectation over  
674  $X$ , and using the half-Gaussian MGF as before, we obtain

$$\mathbb{E}_X \mathbb{E}_Y [|X|^c |Y|^d \exp(t|X|) \exp(|XY|)] \leq C \mathbb{E}_Y [|Y|^d \sigma^c (1+(t+|Y|)^c) e^{(t+|Y|)^2/2}]$$

675 Now applying the first statement to take the expectation over  $Y$ , we obtain

$$\mathbb{E}_Y [|Y|^d (1+(t+|Y|)^c) e^{(t+|Y|)^2/2}] \leq C \sigma^c \rho^d.$$

676 □

677 *Proof of Lemma F.5.* We prove the lemma by induction on  $c$ . Suppose  $c = 0$ . Then by plugging in  
 678 the MGF for the half-normal distribution from Lemma F.13, for some constant  $C$ , we have

$$\mathbb{E}_{X \sim \mathcal{N}(0,1)|X>0}[(e^{t|X|} - 1)] = 2e^{t^2/2}\Phi(t) - 1 \quad (13)$$

$$\leq 2e^{t^2/2} \left( \frac{1+t}{2} \right) - 1 \quad (14)$$

$$\leq (e^{t^2/2} - 1) + te^{t^2/2} \quad (15)$$

$$\leq Ct, \quad (16)$$

679 thus

$$\mathbb{E}_{X \sim \mathcal{N}(0,\sigma^2)}[(e^{t|X|} - 1)] = \mathbb{E}_{X \sim \mathcal{N}(0,\sigma^2)|X>0}[(e^{\sigma t|X|} - 1)] \leq Ct\sigma.$$

680 Now for  $c \geq 1$ , by Stein's Lemma, we have (for a new constant  $C$ ),

$$\mathbb{E}_{X \sim \mathcal{N}(0,\sigma^2)}[|X|^c(e^{t|X|} - 1)] = \mathbb{E}_{X \sim \mathcal{N}(0,\sigma^2)}[X|X|^{c-1} \text{sign}(X)(e^{t|X|} - 1)] \quad (17)$$

$$= \sigma^2 \mathbb{E}_{X \sim \mathcal{N}(0,\sigma^2)} \left[ \frac{d}{dX} (|X|^{c-1} \text{sign}(X)(e^{t|X|} - 1)) \right] \quad (18)$$

$$= \sigma^2 \mathbb{E}_{X \sim \mathcal{N}(0,\sigma^2)} \left[ (c-2) (|X|^{c-2}(e^{t|X|} - 1)) + (|X|^{c-1}(te^{t|X|})) \right] \quad (19)$$

$$\leq Ct\sigma^{c+1}. \quad (20)$$

681 where in the last step we used the inductive hypothesis and Lemma F.4.  $\square$

682 *Proof of Lemma F.6.* First observe that

$$\begin{aligned} & \lim_{\eta \rightarrow 0} \frac{1}{\eta} \left( \mathbb{E}_{U,V} \left[ \arccos \left( \frac{|\mu_k^T \theta_k^+|}{\|\theta_k^+\|_2} \right) \right] - \arccos \left( \frac{|\mu_k^T \theta_k|}{\|\theta_k\|_2} \right) \right) \\ &= \lim_{\eta \rightarrow 0} \frac{1}{\eta} \left( \mathbb{E}_{U,V} \left[ \arccos \left( \frac{|\mu_k^T (\theta_k(1 - \eta\lambda) - \eta\nabla_k)|}{\|\theta_k(1 - \eta\lambda) - \eta\nabla_k\|_2} \right) \right] - \arccos \left( \frac{|\mu_k^T \theta_k|}{\|\theta_k\|_2} \right) \right) \\ &= \lim_{\eta \rightarrow 0} \frac{1}{\eta} \left( \mathbb{E}_{U,V} \left[ \arccos \left( \frac{|\mu_k^T (\theta_k - \frac{\eta}{1-\eta\lambda} \nabla_k)|}{\|\theta_k - \frac{\eta}{1-\eta\lambda} \nabla_k\|_2} \right) \right] - \arccos \left( \frac{|\mu_k^T \theta_k|}{\|\theta_k\|_2} \right) \right) \\ &= \mathbb{E}_{U,V} \left[ \frac{d}{d\eta} \arccos \left( \frac{|\mu_k^T (\theta_k - \eta \nabla_k)|}{\|\theta_k - \eta \nabla_k\|_2} \right) (0) \right], \end{aligned}$$

683 since  $\lim_{\eta \rightarrow 0} \frac{\eta}{1-\eta\lambda} = 0$ . Now

$$\begin{aligned} \frac{d}{d\eta} \arccos \left( \frac{|\mu_k^T (\theta_k - \eta \nabla_k)|}{\|\theta_k - \eta \nabla_k\|_2} \right) (0) &= \arccos' \left( \frac{|\mu_k^T \theta_k|}{\|\theta_k\|_2} \right) \frac{d}{d\eta} \left( \frac{|\mu_k^T (\theta_k - \eta \nabla_k)|}{\|\theta_k - \eta \nabla_k\|_2} \right) (0) \\ &= \arccos' \left( \frac{|\mu_k^T \theta_k|}{\|\theta_k\|_2} \right) \left( \frac{-\text{sign}(\mu_k^T \theta_k) \mu_k^T \nabla_k \|\theta_k\| + |\mu_k^T \theta_k| \frac{\theta_k^T \nabla_k}{\|\theta_k\|}}{\|\theta_k\|_2^2} \right) \\ &= N \left( -\mu_k^T \theta_k \mu_k^T \nabla_k + (\mu_k^T \theta_k)^2 \frac{\theta_k^T \nabla_k}{\|\theta_k\|^2} \right), \end{aligned}$$

684 where  $N = \arccos' \left( \frac{|\mu_k^T \theta_k|}{\|\theta_k\|_2} \right) \frac{1}{\|\theta_k\| |\mu_k^T \theta_k|}$ . The lemma follows by taking the expectation over  $U, V$ ,  
 685 and observing derivative of  $\arccos(x)$  is negative whenever  $x$  is positive.  $\square$

686 *Proof of Lemma F.7.* First observe that by symmetry, we have

$$\frac{d}{dx} \mathbb{E}_{U,V \sim \mathbb{P}_x} [\nabla_k] = m \frac{d}{dx} \mathbb{E}_{U,V \sim \mathbb{P}_x} \left[ \frac{\partial \mathcal{L}_i}{\partial \theta_k} \right].$$

687 To make this expectation easier to analyze, we express the random variable  $(U(x), V(x)) \sim \mathbb{P}_x$  as  
 688 an interpolation of Gaussians in the coordinate  $\mu_{k'}^T v_{k'}^{(i)}$ . Let  $\xi \sim \mathcal{N}(0, 1)$ , and define  $(U, V) \sim \mathbb{P}_1$ ,  
 689 such that  $\mu_{k'}^T v_{k'}^{(i)} = \mu_{k'}^T u_{k'}^{(i)}$ . For  $x \in [0, 1)$ , define  $(U(x), V(x))$  to have

$$\mu_{k'}^T v_{k'}^{(i)}(x) = x \mu_{k'}^T u_{k'}^{(i)} + \sqrt{1-x^2} \xi, \quad (21)$$

690 and otherwise be the same as  $(U, V)$ . It is easy to check that  $(U(x), V(x)) \sim \mathbb{P}_x$ .

691 Now

$$\frac{d}{dx} \mathbb{E}_{U, V \sim \mathbb{P}_x} \left[ \frac{\partial \mathcal{L}_i(\Theta; U, V)}{\partial \theta_k} \right] = \mathbb{E}_{U, V \sim \mathbb{P}_1, \xi} \left[ \frac{d}{dx} \frac{\partial \mathcal{L}_i(\Theta; U(x), V(x))}{\partial \theta_k} \right].$$

692 Taking the derivative of the cross-entropy loss, we have

$$\begin{aligned} \frac{d}{dx} \frac{\partial \mathcal{L}_i(\Theta; U(x), V(x))}{\partial \theta_k} &= \frac{d}{dx} \left( \sum_{j \neq i} p_{ij} \left( \frac{\partial(z_{ij} - z_{ii})}{\partial \theta_k} \right) \right) \\ &= \sum_{j \neq i} \frac{dp_{ij}}{d\mu_{k'}^T v_{k'}^{(i)}(x)} \frac{d\mu_{k'}^T v_{k'}^{(i)}(x)}{dx} \frac{\partial(z_{ij} - z_{ii})}{\partial \theta_k} \\ &= \sum_{j \neq i} -p_{ij} p_{ii} \frac{dz_{ii}}{d\mu_{k'}^T v_{k'}^{(i)}(x)} \left( \mu_{k'}^T u_{k'}^{(i)} - \frac{x}{\sqrt{1-x^2}} \xi \right) \left( \frac{\partial(z_{ij} - z_{ii})}{\partial \theta_k} \right) \end{aligned}$$

693 where the variables  $z_{ij}$  and  $p_{ij}$  are the similarity scores and the softmaxes from the data  $(U(x), V(x))$ .  
 694 Here the first line is by Lemma F.2, and the second line holds by chain rule since  $\frac{\partial z_{ij}}{\partial \theta_k} - \frac{\partial z_{ii}}{\partial \theta_k}$  does  
 695 not depend on  $v_{k'}^{(i)}$ . The third line uses the proof of Claim F.14 to take the derivative of  $p_{ij}$ , and  
 696 Equation 21 to take the derivative of  $\mu_{k'}^T v_{k'}^{(i)}(x)$ .

697 Now we reparameterize  $\mu_{k'}^T u_{k'}^{(i)} - \frac{x}{\sqrt{1-x^2}} \xi$  as follows:

$$\mu_{k'}^T u_{k'}^{(i)} - \frac{x}{\sqrt{1-x^2}} \xi = \left( \frac{1}{1-x^2} \right) \mu_{k'}^T u_{k'}^{(i)} - \frac{x}{1-x^2} \mu_{k'}^T v_{k'}^{(i)}(x).$$

698 Plugging in this reparameterization and  $\frac{dz_{ii}}{d\mu_{k'}^T v_{k'}^{(i)}(x)} = \theta_{k'}^T \mu_{k'} \theta_{k'}^T u_{k'}$ , we obtain

$$\frac{d}{dx} \mathbb{E}_{U, V \sim \mathbb{P}_x} \left[ \frac{\partial \mathcal{L}_i(\Theta; U, V)}{\partial \theta_k} \right] = \frac{-1}{1-x^2} \sum_{j \neq i} \mathbb{E}_{U, V \sim \mathbb{P}_x} \left[ p_{ij} p_{ii} (\theta_{k'}^T \mu_{k'} \theta_{k'}^T u_{k'}) \left( \mu_{k'}^T u_{k'}^{(i)} - x \mu_{k'}^T v_{k'}^{(i)}(x) \right) \left( \frac{\partial(z_{ij} - z_{ii})}{\partial \theta_k} \right) \right].$$

699 □

700 We now prove Lemmas F.8, F.9, F.10, and F.11.

701 **Notation.** Since  $i$  is fixed throughout, we drop the  $(i)$  superscripts and let  $u_k = u_k^{(i)}$  and  $v_k =$   
 702  $v_k^{(i)}$ . We will introduce the following random variables, which are all independent, to simplify the  
 703 exposition:

- 704 •  $\xi_j := \theta_k^T v_k^{(j)}$  for  $j \neq i$ . Thus  $\xi_j \sim \mathcal{N}(0, \|\theta_k\|^2)$ .
- 705 •  $\xi'_j := \theta_{k'}^T v_{k'}^{(j)}$  for  $j \neq i$ . Thus  $\xi'_j \sim \mathcal{N}(0, \|\theta_{k'}\|^2)$ .
- 706 •  $\xi_i := (\theta_k^\perp)^T v_k + (\theta_k^\parallel)^T (v_k - \alpha_k u_k)$ . Thus  $\xi_i \sim \mathcal{N}(0, \|\theta_k^\perp\|^2 + (1 - \alpha_k^2) \|\theta_k^\parallel\|^2)$ .
- 707 •  $\xi'_i := (\theta_{k'}^\perp)^T v_{k'}$ . Thus  $\xi'_i \sim \mathcal{N}(0, \|\theta_{k'}^\perp\|^2 \|\theta_{k'}^\parallel\|^2)$ .
- 708 •  $\zeta'_i := (\theta_{k'}^\parallel)^T (v_{k'} - \alpha_{k'} u_{k'})$ . Thus  $\zeta'_i \sim \mathcal{N}(0, (1 - \alpha_{k'}^2) \|\theta_{k'}^\parallel\|^2)$ .
- 709 •  $y = (\theta_k^\parallel)^T u_k$ . Thus  $y \sim \mathcal{N}(0, \|\theta_k^\parallel\|^2)$ .



- 710 •  $y' = (\theta_{k'}^\parallel)^T u_{k'}$ . Thus  $y' \sim \mathcal{N}(0, \|\theta_{k'}^\parallel\|^2)$ .
- 711 •  $\eta_i := (\theta_k^\perp)^T u_k$ . Thus  $\eta_i \sim \mathcal{N}(0, \|\theta_k^\perp\|^2)$ .
- 712 •  $\eta'_i := (\theta_{k'}^\perp)^T u_{k'}$ . Thus  $\eta'_i \sim \mathcal{N}(0, \|\theta_{k'}^\perp\|^2)$ .

713 For any such random variable  $X$ , we use  $\sigma_X^2$  to denote its variance. Observe that

$$\frac{p_{ii}p_{ij}}{q_{ii}q_{ij}} = \frac{\exp(\theta_k^T u_k \theta_k^T v_k) \exp(\theta_{k'}^T u_{k'} \theta_{k'}^T v_{k'})}{\mathbb{E}_{j' \sim q} \exp(\theta_k^T u_k \theta_k^T v_k^{(j')}) \exp(\theta_{k'}^T u_{k'} \theta_{k'}^T v_{k'}^{(j')})} \frac{\exp(\theta_k^T u_k \theta_k^T v_k^{(j)}) \exp(\theta_{k'}^T u_{k'} \theta_{k'}^T v_{k'}^{(j)})}{\mathbb{E}_{j' \sim q} \exp(\theta_k^T u_k \theta_k^T v_k^{(j')}) \exp(\theta_{k'}^T u_{k'} \theta_{k'}^T v_{k'}^{(j')})}.$$

714 We will use the following two claims in the proofs of all four lemmas.

715 **Claim F.14.** For  $\beta \in \{\xi_j, \xi'_j, \xi_i, \xi'_i, \zeta'_i, \eta_i, \eta'_i, x, x'\}$ , let  $\bar{\beta}_{j'} := \frac{\partial}{\partial \beta} (\theta_k^T u_k \theta_k^T v_k^{(j')} + \theta_{k'}^T u_{k'} \theta_{k'}^T v_{k'}^{(j')})$ .

716 Then

$$\left| \frac{\partial p_{ii}p_{ij}}{\partial \beta} \right| \leq p_{ii}p_{ij} (|\bar{\beta}_j| + |\bar{\beta}_i| + 2\mathbb{E}_{j' \sim q} |\bar{\beta}_{j'}|).$$

717 If additionally  $\gamma \in \{\xi_j, \xi'_j, \xi_i, \xi'_i, \zeta'_i, \eta_i, \eta'_i\}$  and  $\gamma \perp \{\bar{\beta}_{j'}\}_{j' \in [m]}$ , then

$$\begin{aligned} \left| \frac{\partial}{\partial \gamma} \frac{\partial p_{ii}p_{ij}}{\partial \beta} \right| &\leq p_{ii}p_{ij} ( (|\bar{\beta}_j| + |\bar{\beta}_i| + 2\mathbb{E}_{j' \sim q} |\bar{\beta}_{j'}|) (|\bar{\gamma}_j| + |\bar{\gamma}_i| + 2\mathbb{E}_{j' \sim q} |\bar{\gamma}_{j'}|) \\ &\quad + p_{ii}p_{ij} (2\mathbb{E}_{j' \sim q} |\bar{\beta}_{j'} \bar{\gamma}_{j'}| + 2(\mathbb{E}_{j' \sim q} |\bar{\beta}_{j'}|)(\mathbb{E}_{j' \sim q} |\bar{\gamma}_{j'}|) ). \end{aligned}$$

718 *Proof.* By a straightforward quotient-rule computation of the derivative of  $\frac{p_{ij}}{q_{ij}}$ , recalling that  $q_{ij}$  is  
719 independent of  $S$ , we obtain

$$\frac{\partial p_{ij}}{\partial \beta} = p_{ij} (\bar{\beta}_j - \mathbb{E}_{j' \sim q} \bar{\beta}_{j'} p_{ij'}).$$

720 By applying product to the expression above, we obtain

$$\frac{\partial p_{ii}p_{ij}}{\partial \beta} = p_{ii}p_{ij} (\bar{\beta}_j + \bar{\beta}_i - 2\mathbb{E}_{j' \sim q} \bar{\beta}_{j'} p_{ij'}).$$

721 Taking absolute values and using the fact that  $p_{ij'} \leq 1$ , we obtain the first result.

722 Next we take the derivative of  $p_{ij}$  with respect to both  $\beta$  and  $\gamma$ . Using the expression above for  $\frac{\partial p_{ij}}{\partial \beta}$ ,  
723 we obtain

$$\frac{\partial}{\partial \gamma} \frac{\partial p_{ij}}{\partial \beta} = p_{ij} ((\bar{\beta}_j - \mathbb{E}_{j' \sim q} \bar{\beta}_{j'} p_{ij'}) (\bar{\gamma}_j - \mathbb{E}_{j' \sim q} \bar{\gamma}_{j'} p_{ij'}) - \mathbb{E}_{j' \sim q} \bar{\beta}_{j'} \bar{\gamma}_{j'} p_{ij'} + (\mathbb{E}_{j' \sim q} \bar{\beta}_{j'} p_{ij'}) (\mathbb{E}_{j' \sim q} \bar{\gamma}_{j'} p_{ij'})),$$

724 and

$$\begin{aligned} \frac{\partial}{\partial \gamma} \frac{\partial p_{ii}p_{ij}}{\partial \beta} &= p_{ii}p_{ij} ((\bar{\beta}_j + \bar{\beta}_i - 2\mathbb{E}_{j' \sim q} \bar{\beta}_{j'} p_{ij'}) (\bar{\gamma}_j + \bar{\gamma}_i - 2\mathbb{E}_{j' \sim q} \bar{\gamma}_{j'} p_{ij'}) \\ &\quad + p_{ii}p_{ij} (-2\mathbb{E}_{j' \sim q} \bar{\beta}_{j'} \bar{\gamma}_{j'} p_{ij'} + 2(\mathbb{E}_{j' \sim q} \bar{\beta}_{j'} p_{ij'}) (\mathbb{E}_{j' \sim q} \bar{\gamma}_{j'} p_{ij'})). \end{aligned}$$

725 The second result follows by taking absolute values and the fact that  $p_{ij'} \leq 1$ .  $\square$

**Claim F.15.**

$$\frac{p_{ij}}{q_{ij}} \leq \exp(|\theta_k^T u_k \theta_k^T v_k^{(j)}|) \exp(|\theta_{k'}^T u_{k'} \theta_{k'}^T v_{k'}^{(j)}|) \mathbb{E}_{j' \sim q} \left[ \exp(|\theta_k^T u_k \theta_k^T v_k^{(j')}|) \exp(|\theta_{k'}^T u_{k'} \theta_{k'}^T v_{k'}^{(j')}|) \right].$$

726 *Proof.* This follows directly from using Jensen's inequality on the distribution  $j' \sim q$  to show that

$$\begin{aligned} \frac{1}{\mathbb{E}_{j' \sim q} \left[ \exp(\theta_k^T u_k \theta_k^T v_k^{(j')}) \exp(\theta_{k'}^T u_{k'} \theta_{k'}^T v_{k'}^{(j')}) \right]} &\leq \mathbb{E}_{j' \sim q} \left[ \exp(-\theta_k^T u_k \theta_k^T v_k^{(j')}) \exp(-\theta_{k'}^T u_{k'} \theta_{k'}^T v_{k'}^{(j')}) \right] \\ &\leq \mathbb{E}_{j' \sim q} \left[ \exp(|\theta_k^T u_k \theta_k^T v_k^{(j')}|) \exp(|\theta_{k'}^T u_{k'} \theta_{k'}^T v_{k'}^{(j')}|) \right]. \end{aligned}$$

727  $\square$

**Claim F.16.**

$$\left| 1 - \frac{p_{ij}}{q_{ij}} \right| \leq Z_j - 1,$$

where  $Z_j := \exp \left( |\theta_k^T u_k \theta_k^T v_k^{(j)}| \right) \exp \left( |\theta_{k'}^T u_{k'} \theta_{k'}^T v_{k'}^{(j)}| \right) \mathbb{E}_{j' \sim q} \left[ \exp \left( |\theta_k^T u_k \theta_k^T v_k^{(j')}| \right) \exp \left( |\theta_{k'}^T u_{k'} \theta_{k'}^T v_{k'}^{(j')}| \right) \right]$ .

*Proof.* Note that for any  $x \geq 0$ , we have  $|1 - x| \leq \max(x - 1, \frac{1}{x} - 1)$ . By Claim F.15,  $\frac{p_{ij}}{q_{ij}} - 1$  is at most the desired value given in this claim.

Now

$$\begin{aligned} \frac{q_{ij}}{p_{ij}} &= \frac{\mathbb{E}_{j' \sim q} \left[ \exp \left( \theta_k^T u_k \theta_k^T v_k^{(j')} \right) \exp \left( \theta_{k'}^T u_{k'} \theta_{k'}^T v_{k'}^{(j')} \right) \right]}{\exp \left( \theta_k^T u_k \theta_k^T v_k^{(j)} \right) \exp \left( \theta_{k'}^T u_{k'} \theta_{k'}^T v_{k'}^{(j)} \right)} \\ &\leq \exp \left( |\theta_k^T u_k \theta_k^T v_k^{(j)}| \right) \exp \left( |\theta_{k'}^T u_{k'} \theta_{k'}^T v_{k'}^{(j)}| \right) \mathbb{E}_{j' \sim q} \left[ \exp \left( |\theta_k^T u_k \theta_k^T v_k^{(j')}| \right) \exp \left( |\theta_{k'}^T u_{k'} \theta_{k'}^T v_{k'}^{(j')}| \right) \right]. \end{aligned}$$

This yields the claim.  $\square$

*Proof of Lemma F.8.* Expanding  $h(S) - h_1(S)$ , we see that we need to control the following terms:

1. (a)  $|\mathbb{E}_S [p_{ii} p_{ij} (\eta'_i (\mu_{k'}^T u_{k'} - x \mu_{k'}^T v_{k'})) (\mu_k^T u_k \xi_j)]|$ , (b)  $|\mathbb{E}_S [p_{ii} p_{ij} (y' (\mu_{k'}^T u_{k'} - x \mu_{k'}^T v_{k'})) (\mu_k^T u_k \xi_j)]|$
2. (a)  $|\mathbb{E}_S [p_{ii} p_{ij} (\eta'_i (\mu_{k'}^T u_{k'} - x \mu_{k'}^T v_{k'})) (\mu_k^T u_k \xi_i)]|$ , (b)  $|\mathbb{E}_S [p_{ii} p_{ij} ((y' (\mu_{k'}^T u_{k'} - x \mu_{k'}^T v_{k'})) (\mu_k^T u_k \xi_i))]|$
3. (a)  $|\alpha_k \mathbb{E}_S [p_{ii} p_{ij} (\eta'_i (\mu_{k'}^T u_{k'} - x \mu_{k'}^T v_{k'})) (\mu_k^T u_k y)]|$ , (b)  $|\alpha_k \mathbb{E}_S [p_{ii} p_{ij} (y' (-x \xi'_i)) (\mu_k^T u_k y)]|$
4. (a)  $|\mathbb{E}_S [p_{ii} p_{ij} (\eta'_i (\mu_{k'}^T u_{k'} - x \mu_{k'}^T v_{k'})) (\xi_i (v_k - v_k^{(j)})^T \mu_k)]|$   
 (b)  $|\mathbb{E}_S [p_{ii} p_{ij} (y' (\mu_{k'}^T u_{k'} - x \mu_{k'}^T v_{k'})) (\xi_i (v_k - v_k^{(j)})^T \mu_k)]|$
5. (a)  $|\alpha_k \mathbb{E}_S [p_{ii} p_{ij} (\eta'_i (\mu_{k'}^T u_{k'} - x \mu_{k'}^T v_{k'})) (y (v_k - v_k^{(j)})^T \mu_k)]|$   
 (b)  $|\mathbb{E}_S [p_{ii} p_{ij} (y' (\mu_{k'}^T u_{k'} - x \mu_{k'}^T v_{k'})) (y (v_k - \alpha_k u_k - v_k^{(j)})^T \mu_k)]|$

We begin by bounding the terms where the expression after  $p_{ii} p_{ij}$  has two independent mean-0 terms, mainly (1a), (2a), (4a). The first step is to apply Stein's Lemma (Lemma F.3) twice to these two terms, which we will call  $\beta$  and  $\gamma$ . Let  $\beta \gamma g(S \setminus \{\beta, \gamma\})$  be the terms after  $p_{ii} p_{ij}$ . Then we have

$$|\mathbb{E}_S [p_{ii} p_{ij} \beta \gamma g(S \setminus \{\beta, \gamma\})]| \leq \sigma_\beta^2 \sigma_\gamma^2 \left| \mathbb{E}_S \left[ \left| \frac{\partial}{\partial \gamma} \frac{\partial p_{ii} p_{ij}}{\partial \beta} \right| |g(S \setminus \{\beta, \gamma\})| \right] \right|.$$

Next we apply the final result in Claim F.14 to bound the absolute value of  $\left| \frac{\partial}{\partial \gamma} \frac{\partial p_{ii} p_{ij}}{\partial \beta} \right|$ . Once we do this, we achieve

$$|\mathbb{E}_S [p_{ii} p_{ij} \beta \gamma g(S \setminus \{\beta, \gamma\})]| \leq \sigma_\beta^2 \sigma_\gamma^2 q_{ii} q_{ij} \mathbb{E}_S \left[ Z |g(S \setminus \{\beta, \gamma\})| \sum_{j', \ell \in [m]} c_{j', \ell} |\bar{\beta}_{j'}| |\bar{\gamma}_\ell| \right],$$

where  $\sum_{j', \ell \in [m]} c_{j', \ell} \leq C$  for some constant  $C$ , and  $Z := \frac{p_{ii} p_{ij}}{q_{ii} q_{ij}}$ . Finally, we use the bound on  $Z$  from Claim F.15, and then Lemma F.4 to take the expectation over  $S$ , iteratively applying Lemma F.4 to each variable in  $S$ . Thus we have, for some (different) constant  $C$ ,

1.  $|\mathbb{E}_S [p_{ii} p_{ij} (\eta'_i (\mu_{k'}^T u_{k'} - x \mu_{k'}^T v_{k'})) (\mu_k^T u_k \xi_j)]| \leq C q_{ii} q_{ij} \sigma_{\eta'_i}^2 \sigma_{\xi_j}^2 \|\theta_{k'}\| \|\theta_k\| = C q_{ii} q_{ij} \|\theta_{k'}^\perp\|^2 \|\theta_{k'}\| \|\theta_k\|^3 \leq C q_{ii} q_{ij} \|\theta_{k'}\|^3 \|\theta_k\|^3.$
2.  $|\mathbb{E}_S [p_{ii} p_{ij} (\eta'_i (\mu_{k'}^T u_{k'} - x \mu_{k'}^T v_{k'})) (\mu_k^T u_k \xi_i)]| \leq C q_{ii} q_{ij} \sigma_{\eta'_i}^2 \sigma_{\xi_i}^2 \|\theta_{k'}\| \|\theta_k\| \leq C q_{ii} q_{ij} \|\theta_{k'}^\perp\|^2 \|\theta_{k'}\| \|\theta_k\|^3 \leq C q_{ii} q_{ij} \|\theta_{k'}\|^3 \|\theta_k\|^3.$

$$\begin{aligned}
& 3. \left| \mathbb{E}_S \left[ p_{ii} p_{ij} \left( \eta'_i (\mu_{k'}^T u_{k'} - x \mu_{k'}^T v_{k'}) \right) \left( \xi_i (v_k - v_k^{(j)})^T \mu_k \right) \right] \right| \leq C q_{ii} q_{ij} \sigma_{\eta'_i}^2 \sigma_{\xi_i}^2 \|\theta_{k'}\| \|\theta_k\| \leq \\
& C q_{ii} q_{ij} \|\theta_{k'}^\perp\|^2 \|\theta_{k'}\| \|\theta_k\|^3 \leq C q_{ii} q_{ij} \|\theta_{k'}\|^3 \|\theta_k\|^3.
\end{aligned}$$

Now we consider the remaining 7 terms. Here we decompose the expression inside the expectation as  $p_{ii} p_{ij} \beta g(S \setminus \beta)$ , where  $\beta \in S$ . We proceed as before, but we only apply Stein's Lemma once, to  $\beta$ . Applying Steins, the expression for  $\frac{\partial p_{ii} p_{ij}}{\partial \beta}$  given in the first result of Claim F.14, we obtain

$$\left| \mathbb{E}_S [p_{ii} p_{ij} \beta g(S \setminus \beta)] \right| \leq \sigma_\beta^2 \left| \mathbb{E}_S \left[ \left| \frac{\partial p_{ii} p_{ij}}{\partial \beta} \right| |g(S \setminus \beta)| \right] \right| \leq \sigma_\beta^2 q_{ii} q_{ij} \mathbb{E}_S \left[ Z |g(S \setminus \beta)| \sum_{j' \in [m]} c_{j'} |\bar{\beta}_{j'}| \right], \quad (22)$$

where  $\sum_{j' \in [m]} c_{j'} \leq C$  for some constant  $C$ , and  $Z := \frac{p_{ii} p_{ij}}{q_{ii} q_{ij}}$ . Finally, we plug in a bound for  $Z$  in Claim F.15, and use Lemma F.4 to take the expectation over  $S$ , again iteratively over each variable.

Thus we have, for some (different) constant  $C$ ,

$$\begin{aligned}
& 1. \left| \mathbb{E}_S \left[ p_{ii} p_{ij} \left( y' (\mu_{k'}^T u_{k'} - x \mu_{k'}^T v_{k'}) \right) (\mu_k^T u_k \xi_j) \right] \right| \leq C q_{ii} q_{ij} \sigma_{\xi_j}^2 \|\theta_k\| \|\theta_{k'}^\parallel\| = \\
& C q_{ii} q_{ij} \|\theta_k\|^3 \|\theta_{k'}^\parallel\|. \\
& 2. \left| \mathbb{E}_S \left[ p_{ii} p_{ij} \left( y' (\mu_{k'}^T u_{k'} - x \mu_{k'}^T v_{k'}) \right) (\mu_k^T u_k \xi_i) \right] \right| \leq C q_{ii} q_{ij} \sigma_{\xi_i}^2 \|\theta_k\| \|\theta_{k'}^\parallel\| \leq \\
& C q_{ii} q_{ij} \|\theta_k\|^3 \|\theta_{k'}^\parallel\|. \\
& 3. \left| \alpha_k \mathbb{E}_S \left[ p_{ii} p_{ij} \left( \eta'_i (\mu_{k'}^T u_{k'} - x \mu_{k'}^T v_{k'}) \right) (\mu_k^T u_k y) \right] \right| \leq C \alpha_k q_{ii} q_{ij} \sigma_{\eta'_i}^2 \|\theta_{k'}\| \|\theta_k^\parallel\| = \\
& C \alpha_k q_{ii} q_{ij} \|\theta_{k'}^\perp\|^2 \|\theta_{k'}\| \|\theta_k^\parallel\| \leq C \alpha_k q_{ii} q_{ij} \|\theta_{k'}\|^3 \|\theta_k^\parallel\|. \\
& 4. \left| \alpha_k \mathbb{E}_S \left[ p_{ii} p_{ij} \left( y' (-x \zeta'_i) \right) (\mu_k^T u_k y) \right] \right| \leq C \alpha_k q_{ii} q_{ij} \sigma_{\zeta'_i}^2 \|\theta_{k'}\| \|\theta_k^\parallel\| = \\
& C \alpha_k q_{ii} q_{ij} \|\theta_{k'}^\parallel\|^2 \|\theta_{k'}\| \|\theta_k^\parallel\|. \\
& 5. \left| \mathbb{E}_S \left[ p_{ii} p_{ij} \left( y' (\mu_{k'}^T u_{k'} - x \mu_{k'}^T v_{k'}) \right) \left( \xi_i (v_k - v_k^{(j)})^T \mu_k \right) \right] \right| \leq C q_{ii} q_{ij} \sigma_{\xi_i}^2 \|\theta_k\| \|\theta_{k'}^\parallel\| \leq \\
& C q_{ii} q_{ij} \|\theta_k\|^3 \|\theta_{k'}^\parallel\|. \\
& 6. \left| \alpha_k \mathbb{E}_S \left[ p_{ii} p_{ij} \left( \eta'_i (\mu_{k'}^T u_{k'} - x \mu_{k'}^T v_{k'}) \right) \left( x (v_k - v_k^{(j)})^T \mu_k \right) \right] \right| \leq \\
& C \alpha_k q_{ii} q_{ij} \sigma_{\eta'_i}^2 \|\theta_{k'}\| \|\theta_k^\parallel\| = C \alpha_k q_{ii} q_{ij} \|\theta_{k'}^\perp\|^2 \|\theta_{k'}\| \|\theta_k^\parallel\| \leq C \alpha_k q_{ii} q_{ij} \|\theta_{k'}\|^3 \|\theta_k^\parallel\|. \\
& 7. \left| \mathbb{E}_S \left[ p_{ii} p_{ij} \left( y' (\mu_{k'}^T u_{k'} - x \mu_{k'}^T v_{k'}) \right) \left( x (v_k - \alpha_k u_k - v_k^{(j)})^T \mu_k \right) \right] \right| \leq \\
& C q_{ii} q_{ij} \sigma_x^2 \|\theta_k\| \|\theta_{k'}^\parallel\| = C q_{ii} q_{ij} \|\theta_k^\parallel\|^2 \|\theta_{k'}\| \|\theta_k^\parallel\|.
\end{aligned}$$

Combining the bounds on these 10 terms proves the lemma:

$$\left| \mathbb{E}_S \left[ p_{ii} p_{ij} \mu_k^T (h(S) - h_1(S)) \right] \right| \leq C q_{ii} q_{ij} \left( \|\theta_{k'}\|^3 \|\theta_k\|^3 + \|\theta_{k'}^\parallel\| \|\theta_k\|^3 + \alpha_k \left( \|\theta_{k'}\|^3 \|\theta_k^\parallel\| \right) \right).$$

□

*Proof of Lemma F.10.* The proof of Lemma F.10 is nearly identical, besides some differences in the terms we need to bound. We list them below:

$$\begin{aligned}
& 1. (a) \left| \mathbb{E}_S \left[ p_{ii} p_{ij} \left( \eta'_i (\mu_{k'}^T u_{k'} - x \mu_{k'}^T v_{k'}) \right) (\theta_k^T u_k \xi_j) \right] \right| (b) \left| \mathbb{E}_S \left[ p_{ii} p_{ij} \left( y' (\mu_{k'}^T u_{k'} - x \mu_{k'}^T v_{k'}) \right) (\theta_k^T u_k \xi_j) \right] \right| \\
& 2. (a) \left| \mathbb{E}_S \left[ p_{ii} p_{ij} \left( \eta'_i (\mu_{k'}^T u_{k'} - x \mu_{k'}^T v_{k'}) \right) (\theta_k^T u_k \xi_i) \right] \right| (b) \left| \mathbb{E}_S \left[ p_{ii} p_{ij} \left( y' (\mu_{k'}^T u_{k'} - x \mu_{k'}^T v_{k'}) \right) (\theta_k^T u_k \xi_i) \right] \right| \\
& 3. (a) \left| \alpha_k \mathbb{E}_S \left[ p_{ii} p_{ij} \left( \eta'_i (\mu_{k'}^T u_{k'} - x \mu_{k'}^T v_{k'}) \right) (\theta_k^T u_k y) \right] \right| (b) \left| \alpha_k \mathbb{E}_S \left[ p_{ii} p_{ij} \left( y' (\mu_{k'}^T u_{k'} - x \mu_{k'}^T v_{k'}) \right) (\eta_i y) \right] \right| \\
& 4. \left| \alpha_k \mathbb{E}_S \left[ p_{ii} p_{ij} \left( y' (-x \zeta'_i) \right) (\theta_k^T u_k y) \right] \right|
\end{aligned}$$

783 We use the same approach as before. For the terms (1a) and (2a) we apply Stein's Lemma to  $(\eta'_i, \xi_j)$   
 784 and  $(\eta'_i, \xi_i)$  respectively. For (1b), (2b), (3a) and (3b) and (4), we apply Stein's Lemma to  $\xi_j, \xi_i, \eta'_i,$   
 785  $\eta_i,$  and  $\xi'_i$  respectively. Using Claim F.15 and then Lemma F.4 as before, we obtain the following  
 786 result:

$$\begin{aligned}
 787 \quad 1. \quad & \left| \mathbb{E}_S [p_{ii}p_{ij} (\eta'_i (\mu_{k'}^T u_{k'} - x\mu_{k'}^T v_{k'})) (\theta_k^T u_k \xi_j)] \right| \leq C q_{ii} q_{ij} \sigma_{\eta'_i}^2 \sigma_{\xi_j}^2 \|\theta_{k'}\| \|\theta_k\| \|\theta_k\| = \\
 788 \quad & C q_{ii} q_{ij} \|\theta_{k'}^\perp\|^2 \|\theta_{k'}\| \|\theta_k\|^4 \leq C q_{ii} q_{ij} \|\theta_{k'}\|^3 \|\theta_k\|^4. \\
 789 \quad 2. \quad & \left| \mathbb{E}_S [p_{ii}p_{ij} (\eta'_i (\mu_{k'}^T u_{k'} - x\mu_{k'}^T v_{k'})) (\theta_k^T u_k \xi_i)] \right| \leq C q_{ii} q_{ij} \sigma_{\eta'_i}^2 \sigma_{\xi_i}^2 \|\theta_{k'}\| \|\theta_k\| \|\theta_k\| \leq \\
 790 \quad & C q_{ii} q_{ij} \|\theta_{k'}^\perp\|^2 \|\theta_{k'}\| \|\theta_k\|^4 \leq C q_{ii} q_{ij} \|\theta_{k'}\|^3 \|\theta_k\|^4. \\
 791 \quad 3. \quad & \left| \mathbb{E}_S [p_{ii}p_{ij} (y' (\mu_{k'}^T u_{k'} - x\mu_{k'}^T v_{k'})) (\theta_k^T u_k \xi_j)] \right| \leq C q_{ii} q_{ij} \sigma_{\xi_j}^2 \|\theta_k\| \|\theta_k\| \|\theta_{k'}^\parallel\| = \\
 792 \quad & C q_{ii} q_{ij} \|\theta_k\|^4 \|\theta_{k'}^\parallel\| \\
 793 \quad 4. \quad & \left| \mathbb{E}_S [p_{ii}p_{ij} (y' (\mu_{k'}^T u_{k'} - x\mu_{k'}^T v_{k'})) (\theta_k^T u_k \xi_i)] \right| \leq C q_{ii} q_{ij} \sigma_{\xi_i}^2 \|\theta_k\| \|\theta_k\| \|\theta_{k'}^\parallel\| \leq \\
 794 \quad & C q_{ii} q_{ij} \|\theta_k\|^4 \|\theta_{k'}^\parallel\| \\
 795 \quad 5. \quad & \left| \alpha_k \mathbb{E}_S [p_{ii}p_{ij} (\eta'_i (\mu_{k'}^T u_{k'} - x\mu_{k'}^T v_{k'})) (\theta_k^T u_k y)] \right| \leq C \alpha_k q_{ii} q_{ij} \sigma_{\eta'_i}^2 \|\theta_{k'}\| \|\theta_k\| \|\theta_k^\parallel\| = \\
 796 \quad & C \alpha_k q_{ii} q_{ij} \|\theta_{k'}^\perp\|^2 \|\theta_{k'}\| \|\theta_k\| \|\theta_k^\parallel\| \\
 797 \quad 6. \quad & \left| \alpha_k \mathbb{E}_S [p_{ii}p_{ij} (y' (\mu_{k'}^T u_{k'} - x\mu_{k'}^T v_{k'})) (\eta_i y)] \right| \leq C \alpha_k q_{ii} q_{ij} \sigma_{\eta_i}^2 \|\theta_k\| \|\theta_{k'}^\parallel\| \|\theta_k^\parallel\| = \\
 798 \quad & C \alpha_k q_{ii} q_{ij} \|\theta_k^\perp\|^2 \|\theta_k\| \|\theta_{k'}^\parallel\| \|\theta_k^\parallel\|. \\
 799 \quad 7. \quad & \left| \alpha_k \mathbb{E}_S [p_{ii}p_{ij} (y' (-x\xi'_i)) (\theta_k^T u_k y)] \right| \leq C \alpha_k q_{ii} q_{ij} \sigma_{\xi'_i}^2 \|\theta_{k'}\| \|\theta_k\| \|\theta_k^\parallel\| \leq \\
 800 \quad & C \alpha_k q_{ii} q_{ij} \|\theta_{k'}^\parallel\|^2 \|\theta_{k'}\| \|\theta_k\| \|\theta_k^\parallel\|.
 \end{aligned}$$

801 Combining the bounds on these 7 terms, proves the lemma:

$$\left| \mathbb{E}_S [p_{ii}p_{ij} \theta_k^T (h(S) - h_1(S))] \right| \leq C q_{ii} q_{ij} \left( \|\theta_{k'}\|^3 \|\theta_k\|^4 + \|\theta_{k'}^\parallel\| \|\theta_k\|^4 + \alpha_k \left( \|\theta_{k'}\|^3 \|\theta_k\| \|\theta_k^\parallel\| + \|\theta_{k'}^\parallel\| \|\theta_k\|^3 \|\theta_k^\parallel\| \right) \right).$$

802

□

803 We now prove the lemmas on the non-junk terms.

*Proof of Lemma F.9.*

$$\begin{aligned}
 & \mathbb{E}_S \left[ p_{ii}p_{ij} \left( (\theta_{k'}^\parallel)^T u_{k'} u_{k'}^T \mu_{k'} \right) \left( 2\mu_k^T u_k \alpha_k (\theta_k^\parallel)^T u_k \right) \right] \\
 &= \mathbb{E}_S \left[ q_{ii}q_{ij} \left( (\theta_{k'}^\parallel)^T u_{k'} u_{k'}^T \mu_{k'} \right) \left( 2\mu_k^T u_k \alpha_k (\theta_k^\parallel)^T u_k \right) \right] + \mathbb{E}_S \left[ (p_{ii}p_{ij} - q_{ii}q_{ij}) \left( (\theta_{k'}^\parallel)^T u_{k'} u_{k'}^T \mu_{k'} \right) \left( 2\mu_k^T u_k \alpha_k (\theta_k^\parallel)^T u_k \right) \right] \\
 &= 2\alpha_k q_{ii}q_{ij} \theta_{k'}^T \mu_{k'} \theta_k^T \mu_k + 2\alpha_k q_{ii}q_{ij} \mathbb{E}_S \left[ \left( \frac{p_{ii}p_{ij}}{q_{ii}q_{ij}} - 1 \right) \left( (\theta_{k'}^\parallel)^T u_{k'} u_{k'}^T \mu_{k'} \right) \left( \mu_k^T u_k (\theta_k^\parallel)^T u_k \right) \right].
 \end{aligned}$$

804 Now by Claim F.16, we have  $\left| \frac{p_{ii}p_{ij}}{q_{ii}q_{ij}} - 1 \right| \leq Z_i Z_j - 1$  (where the variable's  $Z_i, Z_j$  are defined in the  
 805 Claim F.16) so

$$\begin{aligned}
 & \left| \mathbb{E}_S \left[ \left( \frac{p_{ii}p_{ij}}{q_{ii}q_{ij}} - 1 \right) \left( (\theta_{k'}^\parallel)^T u_{k'} u_{k'}^T \mu_{k'} \right) \left( \mu_k^T u_k (\theta_k^\parallel)^T u_k \right) \right] \right| \leq \mathbb{E}_S \left[ (Z_i Z_j - 1) \left| (\theta_{k'}^\parallel)^T u_{k'} u_{k'}^T \mu_{k'} \right| \left| \mu_k^T u_k (\theta_k^\parallel)^T u_k \right| \right] \\
 & \leq C (\|\theta_k\|^2 + \|\theta_{k'}\|^2) \|\theta_{k'}^\parallel\| \|\theta_k^\parallel\|.
 \end{aligned}$$

806 Here the second inequality follows from applying Lemma F.5 first, and then Lemma F.4 repeatedly for  
 807 the remainder of the variables in  $S$ . This proves the lemma. Note that we need to apply Lemma F.5  
 808 several times to a single variable  $X \in S$ . Indeed we can write

$$\begin{aligned}
 (Z_i Z_j - 1) \left| (\theta_{k'}^\parallel)^T u_{k'} u_{k'}^T \mu_{k'} \right| \left| \mu_k^T u_k (\theta_k^\parallel)^T u_k \right| &= (\mathbb{E}_\ell \exp(|t_\ell X|) S_\ell - 1) B |X|^c \\
 &= (\mathbb{E}_\ell S_\ell (\exp(|t_\ell X|) - 1)) B |X|^c + (\mathbb{E}_\ell S_\ell - 1) B |X|^c
 \end{aligned}$$

809 for some distribution on  $\ell$ , and for some terms  $S_\ell, t_\ell$ , and  $B$  that are independent of  $X$ , and  $c \in$   
810  $\{0, 1, 2\}$ . Then to take the expectation of this term over  $X$ , we first apply Lemma F.5 to on  $X$  to the  
811 first term, and iteratively apply Lemma F.5 to the random variables appearing in the next terms.  $\square$

*Proof of Lemma F.11.*

$$\begin{aligned} \frac{1}{1-x^2} \mathbb{E}_S [p_{ii} p_{ij} \theta_k^T h_1(S)] &= \mathbb{E}_S \left[ p_{ii} p_{ij} \left( (\theta_{k'}^\parallel)^T u_{k'} u_{k'}^T \mu_{k'} \right) \left( 2(\theta_k^\parallel)^T u_k \alpha_k (\theta_k^\parallel)^T u_k \right) \right] \\ &= \mathbb{E}_S \left[ q_{ii} q_{ij} \left( (\theta_{k'}^\parallel)^T u_{k'} u_{k'}^T \mu_{k'} \right) \left( 2\alpha_k ((\theta_k^\parallel)^T u_k)^2 \right) \right] \\ &\quad + \mathbb{E}_S \left[ (p_{ii} p_{ij} - q_{ii} q_{ij}) \left( (\theta_{k'}^\parallel)^T u_{k'} u_{k'}^T \mu_{k'} \right) \left( 2\alpha_k ((\theta_k^\parallel)^T u_k)^2 \right) \right] \\ &= 2\alpha_k q_{ii} q_{ij} \theta_{k'}^T \mu_{k'} \|\theta_k^\parallel\|^2 + 2\alpha_k q_{ii} q_{ij} \mathbb{E}_S \left[ \left( \frac{p_{ii} p_{ij}}{q_{ii} q_{ij}} - 1 \right) \left( (\theta_{k'}^\parallel)^T u_{k'} u_{k'}^T \mu_{k'} \right) \left( (\theta_k^\parallel)^T u_k \right)^2 \right]. \end{aligned}$$

812 Now by Claim F.16, we have  $\left| \frac{p_{ii} p_{ij}}{q_{ii} q_{ij}} - 1 \right| \leq Z_i Z_j - 1$ , so

$$\begin{aligned} \left| \mathbb{E}_S \left[ \left( \frac{p_{ii} p_{ij}}{q_{ii} q_{ij}} - 1 \right) \left( (\theta_{k'}^\parallel)^T u_{k'} u_{k'}^T \mu_{k'} \right) \left( (\theta_k^\parallel)^T u_k \right)^2 \right] \right| &\leq \mathbb{E}_S \left[ (Z_i Z_j - 1) \left| (\theta_{k'}^\parallel)^T u_{k'} u_{k'}^T \mu_{k'} \right| \left( (\theta_k^\parallel)^T u_k \right)^2 \right] \\ &\leq C (\|\theta_k\|^2 + \|\theta_{k'}\|^2) \|\theta_{k'}^\parallel\| \|\theta_k^\parallel\|^2, \end{aligned}$$

813 Again the second inequality follows from applying Lemma F.5 first (several times as described in the  
814 previous lemma), and then Lemma F.4 repeatedly for the remainder of the variables in  $S$ . Taking  
815 absolute values proves the lemma.

816  $\square$
